# Supplementary material for: Orthogonally protected d-galactosamine thioglycoside building blocks via highly regioselective, double serial and double parallel inversions of β-d-thiomannoside
Source: Royal Society of Chemistry journal article supplement (doi:10.1039/c3ob40935j), 2013-01-01
Supplement: c3ob40935j.pdf [file c3ob40935j.pdf]

## Supporting Information

### Orthogonally Protected D-Galactosamine Thioglycoside Building Blocks via Highly Regioselective, Double serial and Double Parallel Inversions of $\beta$ -D- Thiomannoside

Madhu Emmadi and Suvarn S. Kulkarni\*

Department of Chemistry, Indian Institute of Technology Bombay,

Mumbai 400076, India.

[suvarn@chem.iitb.ac.in](mailto:suvarn@chem.iitb.ac.in)

#### Table of Contents

##### I. Experimental procedures:

|                                       |     |
|---------------------------------------|-----|
| General methods.....                  | S3  |
| Synthesis of compound <b>2a</b> ..... | S4  |
| Synthesis of compound <b>2b</b> ..... | S5  |
| Synthesis of compound <b>5a</b> ..... | S5  |
| Synthesis of compound <b>5b</b> ..... | S6  |
| Synthesis of compound <b>6a</b> ..... | S7  |
| Synthesis of compound <b>6b</b> ..... | S8  |
| Synthesis of compound <b>8a</b> ..... | S8  |
| Synthesis of compound <b>8b</b> ..... | S9  |
| Synthesis of compound <b>9</b> .....  | S10 |
| Synthesis of compound <b>10</b> ..... | S11 |
| Synthesis of compound <b>11</b> ..... | S11 |
| Synthesis of compound <b>13</b> ..... | S12 |
| Synthesis of compound <b>15</b> ..... | S13 |
| Synthesis of compound <b>16</b> ..... | S14 |
| Synthesis of compound <b>17</b> ..... | S14 |

## II. Spectra:

|                                                                           |     |
|---------------------------------------------------------------------------|-----|
| <sup>1</sup> H NMR spectrum of compound <b>2a</b> .....                   | S16 |
| <sup>13</sup> C NMR spectrum of compound <b>2a</b> .....                  | S17 |
| <sup>1</sup> H NMR spectrum of compound <b>2b</b> .....                   | S18 |
| <sup>13</sup> C NMR spectrum of compound <b>2b</b> .....                  | S19 |
| <sup>1</sup> H NMR spectrum of compound <b>5a</b> .....                   | S20 |
| <sup>13</sup> C NMR spectrum of compound <b>5a</b> .....                  | S21 |
| <sup>1</sup> H NMR spectrum of compound <b>5b</b> .....                   | S22 |
| <sup>13</sup> C NMR spectrum of compound <b>5b</b> .....                  | S23 |
| <sup>1</sup> H NMR spectrum of compound <b>6a</b> .....                   | S24 |
| <sup>13</sup> C NMR spectrum of compound <b>6a</b> .....                  | S25 |
| <sup>1</sup> H- <sup>1</sup> H COSY spectrum of compound <b>6a</b> .....  | S26 |
| <sup>1</sup> H NMR spectrum of compound <b>6b</b> .....                   | S27 |
| <sup>13</sup> C NMR spectrum of compound <b>6b</b> .....                  | S28 |
| <sup>1</sup> H- <sup>1</sup> H COSY spectrum of compound <b>6b</b> .....  | S29 |
| <sup>1</sup> H NMR spectrum of compound <b>8a</b> .....                   | S30 |
| <sup>13</sup> C NMR spectrum of compound <b>8a</b> .....                  | S31 |
| <sup>1</sup> H- <sup>1</sup> H COSY spectrum of compound <b>8a</b> .....  | S32 |
| <sup>1</sup> H NMR spectrum of compound <b>8b</b> .....                   | S33 |
| <sup>13</sup> C NMR spectrum of compound <b>8b</b> .....                  | S34 |
| <sup>1</sup> H- <sup>1</sup> H COSY spectrum of compound <b>8b</b> .....  | S35 |
| <sup>1</sup> H NMR spectrum of compound <b>9</b> .....                    | S36 |
| <sup>13</sup> C NMR spectrum of compound <b>9</b> .....                   | S37 |
| <sup>1</sup> H- <sup>1</sup> H COSY spectrum of compound <b>9</b> .....   | S38 |
| <sup>1</sup> H NMR spectrum of compound <b>10</b> .....                   | S39 |
| <sup>13</sup> C NMR spectrum of compound <b>10</b> .....                  | S40 |
| <sup>1</sup> H NMR spectrum of compound <b>11</b> .....                   | S41 |
| <sup>13</sup> C NMR spectrum of compound <b>11</b> .....                  | S42 |
| <sup>1</sup> H NMR spectrum of compound <b>13</b> .....                   | S43 |
| <sup>13</sup> C NMR spectrum of compound <b>13</b> .....                  | S44 |
| <sup>1</sup> H- <sup>13</sup> C COSY spectrum of compound <b>13</b> ..... | S45 |
| <sup>1</sup> H- <sup>1</sup> H COSY spectrum of compound <b>13</b> .....  | S46 |
| <sup>1</sup> H- <sup>1</sup> H COSY spectrum of compound <b>13</b> .....  | S47 |

|                                                                          |     |
|--------------------------------------------------------------------------|-----|
| <sup>1</sup> H NMR spectrum of compound <b>15</b> .....                  | S48 |
| <sup>13</sup> C NMR spectrum of compound <b>15</b> .....                 | S49 |
| <sup>1</sup> H- <sup>1</sup> H COSY spectrum of compound <b>15</b> ..... | S50 |
| <sup>1</sup> H NMR spectrum of compound <b>16</b> .....                  | S51 |
| <sup>13</sup> C NMR spectrum of compound <b>16</b> .....                 | S52 |
| <sup>1</sup> H- <sup>1</sup> H COSY spectrum of compound <b>16</b> ..... | S53 |
| <sup>1</sup> H NMR spectrum of compound <b>17</b> .....                  | S54 |
| <sup>13</sup> C NMR spectrum of compound <b>17</b> .....                 | S55 |
| <sup>1</sup> H- <sup>1</sup> H COSY spectrum of compound <b>17</b> ..... | S56 |

## Experimental Section

**General Methods.** All reactions were conducted under a dry nitrogen atmosphere. Solvents (CH<sub>2</sub>Cl<sub>2</sub> >99%, THF 99.5%, Acetonitrile 99.8%, DMF 99.5%) were purchased in capped bottles and dried under sodium or CaH<sub>2</sub>. All other solvents and reagents were used without further purification. All glasswares used were oven dried before use. TLC was performed on pre-coated Aluminium plates of Silica Gel 60 F254 (0.25 mm, E. Merck). Developed TLC plates were visualized under a short-wave UV lamp and by heating plates that were dipped in ammonium molybdate/cerium (IV) sulfate solution. Silica gel column chromatography was performed using Silica Gel (100-200 mesh) and employed a solvent polarity correlated with TLC mobility. NMR experiments were conducted on 400 MHz instrument using CDCl<sub>3</sub> (D, 99.8%) as solvent. Chemical shifts are relative to the deuterated solvent peaks and are in parts per million (ppm). <sup>1</sup>H-<sup>1</sup>H COSY and HSQC were used to confirm proton assignments. Mass spectra were acquired in the ESI mode. Specific rotation experiments were measured at 589 nm (Na) and 25 °C. IR spectra were recorded on an FT-IR spectrometer using CsCl plates.

**Phenyl 3-O-Acetyl-6-O-*t*-butyldiphenylsilyl-1-thio- $\beta$ -D-mannopyranoside (2a).**

To a solution of **1** (1.2 g, 4.5 mmol) in pyridine (4.8 mL, 59.1 mmol) was added *tert*-butyldiphenylsilyl chloride (2.4 mL, 9.1 mmol). After 12 h, reaction mixture was concentrated and the residue was dissolved in CHCl<sub>3</sub> and washed with water. Separated aqueous layer was washed with CHCl<sub>3</sub> twice. Combined organic layers were dried over Na<sub>2</sub>SO<sub>4</sub> and concentrated *in vacuo*.

The crude product so obtained was dissolved in THF (40 ml) and to this clear solution, Me<sub>2</sub>SnCl<sub>2</sub> (50 mg, 0.2 mmol) and DIPEA (1.6 mL, 9.1 mmol) were added. After 2 min, AcCl (0.35 mL, 5.0 mmol) was added and the solution was stirred at rt for 1.5 h. After complete consumption of the starting material, the reaction was quenched with 3% HCl and extracted with EtOAc (30 mL). Separated organic layer was dried over Na<sub>2</sub>SO<sub>4</sub> and concentrated *in vacuo*. The crude product was purified by column chromatography on silica gel (40% ethyl acetate: pet ether) to obtain **2a** as a white foam (2.1 g, 84%):  $[\alpha]_D^{20}$  -50.2 (*c* 3.53, CHCl<sub>3</sub>); IR (CHCl<sub>3</sub>)  $\nu$  3475, 3019, 2932, 1733, 1428, 1216, 1114, 1067, 758, 669 cm<sup>-1</sup>; <sup>1</sup>H NMR (400 MHz, CDCl<sub>3</sub>)  $\delta$  7.71-7.68 (m, 5H, ArH), 7.48-7.35 (m, 10H, ArH), 4.91 (s, 1H, H-1), 4.84 (dd, *J* = 10.0, 3.2 Hz, 1H, H-3), 4.30-4.28 (m, 1H, H-2), 4.14-4.09 (m, 1H, H-4), 3.97 (d, *J* = 4.8 Hz, 2H, H-6a, H-6b), 3.50-3.45 (m, 1H, H-5), 2.79 (bs, 1H, OH), 2.25 (d, *J* = 6.2 Hz, 1H, OH), 2.18 (s, 3H, CH<sub>3</sub>), 1.07 (s, 9H, Si(CH<sub>3</sub>)<sub>3</sub>);  $\delta$  171.1, 135.9, 135.8, 135.7, 134.0, 132.9, 132.7, 131.5, 131.3, 130.1, 129.2, 128.0, 127.86, 127.81, 87.2, 79.7, 77.0, 70.7, 67.0, 64.9, 26.8, 21.3, 19.3; HR-ESI-MS (*m/z*): [M + Na]<sup>+</sup> calcd. for C<sub>30</sub>H<sub>36</sub>O<sub>6</sub>NaSSi, 575.1900; found, 575.1860.

**Phenyl 3-*O*-Benzoyl-6-*O*-*t*-butyldiphenylsilyl-1-thio- $\beta$ -D-mannopyranoside (2b).**

The same procedure as described for **2a** was followed for preparation of **2b**, starting from **1** (0.57 g, 2.1 mmol) via selective TBDPS protection at O6 followed by benzylation at O3 using BzCl (0.27 mL, 2.3 mmol) to obtain **2b** as a white amorphous solid (1.12 g, 87%):  $[\alpha]_D^{20}$  -30.2 (*c* 2.22, CHCl<sub>3</sub>); IR (CHCl<sub>3</sub>)  $\nu$  3412, 3019, 2929, 1719, 1216, 1048, 759, 669 cm<sup>-1</sup>; <sup>1</sup>H NMR (400 MHz, CDCl<sub>3</sub>)  $\delta$  8.12-8.10 (m, 2H, ArH), 7.73-7.72 (m, 4H, ArH), 7.71-7.24 (m, 14H, ArH), 5.09 (dd, *J* = 9.8, 3.2 Hz, 1H, H-3), 5.00 (d, *J* = 0.8 Hz, 1H, H-1), 4.43-4.41 (m, 1H, H-2), 4.25 (dt, *J* = 9.8, 3.2 Hz, 1H, H-4), 4.05-3.98 (m, 2H, H-6), 3.59-3.54 (m, 1H, H-5), 2.89 (d, *J* = 3.2 Hz, 1H, OH), 2.41 (d, *J* = 6.4 Hz, 1H, OH), 1.08 (s, 9H, Si(CH<sub>3</sub>)<sub>3</sub>); <sup>13</sup>C NMR (100 MHz, CDCl<sub>3</sub>)  $\delta$  166.6, 135.87, 135.0, 134.2, 133.7, 133.0, 132.9, 131.5, 130.1, 130.09, 129.6, 129.3, 128.7, 128.0, 127.8, 87.3, 79.7, 76.9, 70.9, 67.2, 64.9, 27.0, 19.4; HR-ESI-MS (*m/z*): [M + Na]<sup>+</sup> calcd. for C<sub>35</sub>H<sub>38</sub>O<sub>6</sub>NaSSi, 637.2056; found, 637.2054.

**Phenyl 3-*O*-Acetyl-2,4-diazido-2,4-dideoxy-6-*O*-*t*-butyldiphenylsilyl-1-thio- $\beta$ -D-galactopyranoside (5a).**

Trifluoromethanesulfonic anhydride (0.27 mL, 1.6 mmol) was added drop wise at -10 °C to a stirred solution of phenyl 3-*O*-acetyl-6-*O*-*t*-butyldiphenylsilyl-1-thio- $\beta$ -D-mannopyranoside **2a** (0.15 g, 0.27 mmol) and pyridine (0.28 mL, 3.5 mmol) in CH<sub>2</sub>Cl<sub>2</sub> (8 mL) and the solution was gradually brought to 10 °C. After 2 h the reaction mixture was concentrated *in vacuo* and the crude product was used for the next step without purification.

The crude product was dissolved in DMF (3 mL) and to this, NaN<sub>3</sub> (0.2 g, 3.2 mmol) was added. This reaction mixture was stirred at rt for 10 h and then it was diluted with EtOAc and washed with water. Separated aqueous layer was washed

twice with EtOAc. The combined organic layers were dried over Na<sub>2</sub>SO<sub>4</sub> and concentrated *in vacuo*. The crude product was purified by column chromatography (10% ethyl acetate: pet ether) to obtain **5a** as a pale yellowish liquid (0.134 g, 85%):  $[\alpha]_D^{20}$  -8.9 (*c* 4.0, CHCl<sub>3</sub>); IR (CHCl<sub>3</sub>)  $\nu$  3013, 2931, 2858, 2114, 1750, 1472, 1428, 1363, 1275, 1217, 1113, 822, 759, 608, 505 cm<sup>-1</sup>; <sup>1</sup>H NMR (400 MHz, CDCl<sub>3</sub>)  $\delta$  7.66-7.63 (m, 4H, ArH), 7.58-7.51 (m, 2H, ArH), 7.47-7.37 (m, 6H, ArH), 7.31-7.28 (m, 3H, ArH), 4.95 (dd, *J* = 10.0, 3.6 Hz, 1H, H-3), 4.39 (d, *J* = 10.0 Hz, 1H, H-1), 4.16 (d, *J* = 3.6 Hz, 1H, H-4), 3.84-3.70 (m, 2H, H-6a, 6b), 3.72-3.62 (m, 2H, H-2, H-5), 2.19 (s, 3H, CH<sub>3</sub>), 1.05 (s, 9H, (CH<sub>3</sub>)<sub>3</sub>CSi); <sup>13</sup>C NMR (100 MHz, CDCl<sub>3</sub>)  $\delta$  170.0, 135.7, 133.4, 132.94, 132.89, 131.2, 130.1, 129.2, 128.6, 128.0, 86.9, 77.2, 75.2, 62.3, 59.9, 59.6, 27.0, 20.8, 19.3; HR-ESI-MS (*m/z*): [M + Na]<sup>+</sup> calcd. for C<sub>30</sub>H<sub>34</sub>N<sub>6</sub>O<sub>4</sub>NaSSi, 625.2029; found, 625.2028.

**Phenyl 2,4-Diaziido-3-O-benzoyl-2,4-dideoxy-6-O-*t*-butyldiphenylsilyl-1-thio- $\beta$ -D-galactopyranoside (5b).**

The same procedure as described for **5a** was followed for triflation of **2b** (2.25 g, 3.66 mmol) and its double displacement with NaN<sub>3</sub> to afford **5b** as a pale yellowish liquid (2.0 g, 84%):  $[\alpha]_D^{20}$  -18.1 (*c* 0.68, CHCl<sub>3</sub>); IR (CHCl<sub>3</sub>)  $\nu$  3019, 2928, 2115, 1726, 1216, 1112, 758, 669 cm<sup>-1</sup>; <sup>1</sup>H NMR (400 MHz, CDCl<sub>3</sub>)  $\delta$  8.10 (d, *J* = 6.8 Hz, 2H, ArH), 7.66-7.60 (m, 5H, ArH), 7.56-7.40 (m, 10H, ArH), 7.38-7.31 (m, 3H, ArH), 5.24 (dd, *J* = 10.0, 3.5 Hz, 1H, H-3), 4.52 (d, *J* = 10.0 Hz, 1H, H-1), 4.29 (d, *J* = 3.5 Hz, 1H, H-4), 3.90-3.69 (m, 3H, H-6a, 6b & H-5), 3.74 (t, *J* = 10.0 Hz, 1H, H-2), 1.05 (s, 9H, (CH<sub>3</sub>)<sub>3</sub>CSi); <sup>13</sup>C NMR (100 MHz, CDCl<sub>3</sub>)  $\delta$  165.5, 135.6, 134.0, 133.3, 132.9, 132.8, 131.2, 130.2, 130.1, 129.2, 128.8, 128.6, 128.5, 128.0, 86.9, 77.3, 75.3, 62.3, 60.3, 59.9, 26.9, 19.3; HR-ESI-MS (*m/z*): [M + Na]<sup>+</sup> calcd. For C<sub>35</sub>H<sub>36</sub>N<sub>6</sub>O<sub>4</sub>NaSSi 687.2186, found 687.2171.

**Phenyl 3-O-Acetyl-2-azido-2-deoxy-6-O-*t*-butyldiphenylsilyl-1-thio- $\beta$ -D-galactopyranoside (6a).**

Trifluoromethanesulfonic anhydride (2.9 mL, 17.5 mmol) and pyridine (2.9 mL, 37.6 mmol) were added sequentially at -10 °C to a stirred solution of **2a** (1.6 g, 2.9 mmol) in CH<sub>2</sub>Cl<sub>2</sub> (65 mL). Then the reaction mixture was gradually warmed to 10 °C. After 2 h, reaction mixture was diluted with CH<sub>2</sub>Cl<sub>2</sub> and washed successively with 1M HCl, aq. NaHCO<sub>3</sub> and brine. Separated organic layer was dried over Na<sub>2</sub>SO<sub>4</sub> and concentrated.

The crude product so obtained was dissolved in acetonitrile (60 mL) and to this, TBAN<sub>3</sub> (0.74 g, 2.6 mmol) was added at -30 °C and this reaction was stirred at the same temperature for 20 h. TBANO<sub>2</sub> (2.4 g, 8.6 mmol) was added and the reaction mixture was stirred at rt for 1 h. Reaction mixture was diluted with EtOAc and washed with water. Separated organic layer was dried over Na<sub>2</sub>SO<sub>4</sub> and concentrated *in vacuo*. The crude product was purified by column chromatography on silica gel (1:9 ethyl acetate: pet ether) to obtain **6a** as a pale yellowish viscous liquid (1.0 g, 60%): [ $\alpha$ ]<sub>D</sub><sup>25</sup> +11.4 (*c* 0.12, CHCl<sub>3</sub>); IR (CHCl<sub>3</sub>)  $\nu$  3455, 3019, 2932, 2115, 1748, 1523, 1427, 1364, 1217, 928, 770, 669, 623 cm<sup>-1</sup>; <sup>1</sup>H NMR (400 MHz, CDCl<sub>3</sub>)  $\delta$  7.76-7.74 (m, 2H, ArH), 7.69-7.66 (m, 2H, ArH), 7.64-7.61 (m, 2H, ArH), 7.46-7.37 (m, 6H, ArH), 7.30-7.24 (m, 3H, ArH), 4.77 (dd, *J* = 10.0, 2.8 Hz, 1H, H-3), 4.47 (d, *J* = 10.0 Hz, 1H, H-1), 4.28 (d, *J* = 2.8 Hz, 1H, H-4), 4.02 (dd, *J* = 11.2, 4.0 Hz, 1H, H-6a), 3.92 (dd, *J* = 11.2, 4.0 Hz, 1H, H-6b), 3.85 (t, *J* = 10.0 Hz, 1H, H-2), 3.61 (bs, 1H, OH), 3.51 (t, *J* = 4.0 Hz, 1H, H-5), 2.17 (s, 3H, CH<sub>3</sub>), 1.07 (s, 9H, (CH<sub>3</sub>)<sub>3</sub>CSi); <sup>13</sup>C NMR (100 MHz, CDCl<sub>3</sub>)  $\delta$  170.3, 135.8, 135.7, 133.6, 132.4, 132.0, 131.2, 130.27, 130.23, 129.24, 128.5, 128.1, 128.0, 86.5, 76.7, 75.8, 68.4, 65.2, 59.2, 26.8,

21.2, 19.2; HR-ESI-MS ( $m/z$ ):  $[M + Na]^+$  calcd. For  $C_{30}H_{35}N_3O_5NaSSi$  600.1964, found 600.1980.

**Phenyl 2-Azido-3-O-benzoyl-2-deoxy-6-O-*t*-butyldiphenylsilyl-1-thio- $\beta$ -D-galactopyranoside (6b).**

The same procedure as described for **6a** was followed for double serial displacement of **2b** (0.14 g, 0.23 mmol) to obtain **6b** as a pale yellowish viscous liquid (89 mg, 61%):  $[\alpha]_D^{25} +36.6$  ( $c$  0.61,  $CHCl_3$ ); IR ( $CHCl_3$ )  $\nu$  3464, 3019, 2931, 2115, 1721, 1602, 1428, 1268, 1216, 1113, 929, 770, 669, 622, 505  $cm^{-1}$ ;  $^1H$  NMR (400 MHz,  $CDCl_3$ )  $\delta$  8.08 (d,  $J = 6.8$  Hz, 2H, ArH), 7.76-7.55 (m, 7H, ArH), 7.47-7.36 (m, 8H, ArH), 7.33-7.24 (m, 3H, ArH), 4.98 (dd,  $J = 10.0, 2.8$  Hz, 1H, H-3), 4.55 (d,  $J = 10.0$  Hz, 1H, H-1), 4.44 (d,  $J = 2.8$  Hz, 1H, H-4), 4.05-3.93 (m, 3H, H-6a, 6b & H-2), 3.60 (t,  $J = 4.0$  Hz, 1H, H-5), 3.33 (bs, 1H, OH) 1.06 (s, 9H,  $(CH_3)_3CSi$ );  $^{13}C$  NMR (100 MHz,  $CDCl_3$ )  $\delta$  165.9, 135.8, 135.7, 133.7, 133.5, 132.5, 132.2, 131.5, 130.24, 130.21, 130.1, 129.4, 129.2, 128.6, 128.5, 128.12, 128.09, 86.8, 77.5, 76.6, 68.2, 64.9, 59.7, 26.9, 19.2; HRMS calcd for  $C_{35}H_{37}O_5SN_3Si$   $[M + Na]^+$  662.2121, found 662.2112.

**Phenyl 3-O-Acetyl-4-azido-4-deoxy-6-O-*t*-butyldiphenylsilyl-1-thio- $\beta$ -D-galactopyranoside (8a).**

Trifluoromethanesulfonic anhydride (0.27 mL, 1.62 mmol) and pyridine (0.28 mL, 3.5 mmol) were added sequentially at  $-10$  °C to a stirred solution of **2a** (0.15 g, 0.27 mmol) in  $CH_2Cl_2$  (8 mL). Then the reaction mixture was gradually warmed to  $10$  °C. After 2 h, it was diluted with  $CH_2Cl_2$  and washed successively with 1M HCl, aq.  $NaHCO_3$  and brine. Separated organic layer was dried over  $Na_2SO_4$ , concentrated.

The crude product so obtained was dissolved in acetonitrile (3 mL) and to this,  $TBANO_2$  (0.23 g, 0.8 mmol) was added at  $0$  °C and this reaction was stirred at the



same temperature for 30 min. After that, TBAN<sub>3</sub> (0.23 g, 0.8 mmol) was added at 0 °C and the reaction mixture was brought to rt. After stirring at rt for 3 h, reaction mixture was diluted with EtOAc and washed with water. Separated organic layer was dried over Na<sub>2</sub>SO<sub>4</sub> and concentrated *in vacuo*. The crude product was purified by column chromatography on silica gel (1:9 ethyl acetate: pet ether) to obtain **8a** as a pale yellowish viscous liquid (84 mg, 54%):  $[\alpha]_D^{20} +3.9$  (*c* 1.47, CHCl<sub>3</sub>); IR (CHCl<sub>3</sub>)  $\nu$  2929, 2851, 2109, 1744, 1218, 1113, 768, 702 cm<sup>-1</sup>; <sup>1</sup>H NMR (400 MHz, CDCl<sub>3</sub>)  $\delta$  7.67-7.65 (m, 4H, ArH), 7.50-7.38 (m, 9H, ArH), 7.29-7.27 (m, 2H, ArH), 5.07 (dd, *J* = 9.6, 3.4 Hz, 1H, H-3), 4.50 (d, *J* = 9.6 Hz, 1H, H-1), 4.19 (d, *J* = 3.4 Hz, 1H, H-4), 3.85-3.76 (m, 3H, H-2, H-6a & H-6b), 3.70 (t, *J* = 6.4 Hz, 1H, H-5), 2.19 (s, 3H, CH<sub>3</sub>), 1.06 (s, 9H, (CH<sub>3</sub>)<sub>3</sub>CSi); <sup>13</sup>C NMR (100 MHz, CDCl<sub>3</sub>)  $\delta$  170.6, 135.7, 133.0, 132.9, 132.8, 131.6, 130.1, 129.2, 128.4, 128.0, 89.3, 77.28, 76.0, 67.5, 62.4, 60.3, 26.9, 20.9, 19.3; HR-ESI-MS (*m/z*): [M + Na]<sup>+</sup> calcd. for C<sub>30</sub>H<sub>35</sub>N<sub>3</sub>O<sub>5</sub>NaSSi, 600.1964, found 600.1965.

**Phenyl 4-Azido-3-O-benzoyl-4-deoxy-6-O-*t*-butyldiphenylsilyl-1-thio- $\beta$ -D-galactopyranoside (8b).**

The same procedure as described for **8a** was followed for a double serial inversion of **2b** (0.24 g, 0.4 mmol) to obtain **8b** as a pale yellowish viscous liquid (0.14 g, 56%):  $[\alpha]_D^{20} -28.2$  (*c* 0.95, CHCl<sub>3</sub>); IR (CHCl<sub>3</sub>)  $\nu$  2929, 2111, 1726, 1216, 1113, 768, 669 cm<sup>-1</sup>; <sup>1</sup>H NMR (400 MHz, CDCl<sub>3</sub>)  $\delta$  8.14-8.12 (m, 2H, ArH), 7.68-7.58 (m, 5H, ArH), 7.52-7.36 (m, 10H, ArH), 7.30-7.27 (m, 3H, ArH), 5.40 (dd, *J* = 9.6, 3.6 Hz, 1H, H-3), 4.59 (d, *J* = 9.6 Hz, 1H, H-1), 4.28 (d, *J* = 3.6 Hz, 1H, H-4), 3.97 (t, *J* = 9.6 Hz, 1H, H-5), 3.89-3.77 (m, 3H, H-5, H-6a & H-6b), 1.06 (s, 9H, (CH<sub>3</sub>)<sub>3</sub>CSi); <sup>13</sup>C NMR (100 MHz, CDCl<sub>3</sub>)  $\delta$  166.2, 135.7, 133.8, 133.0, 132.8, 131.8, 130.3, 130.1, 129.2,

129.1, 128.7, 128.3, 128.0, 89.5, 77.4, 76.2, 68.0, 62.4, 60.8, 27.0, 19.3; HR-ESI-MS ( $m/z$ ):  $[M + Na]^+$  calcd. for  $C_{35}H_{37}N_3O_5NaSSi$ , 662.2121, found 662.2158.

**Phenyl 4-*O*-Acetyl-2-azido-2-deoxy-6-*O*-*t*-butyldiphenylsilyl-1-thio- $\beta$ -D-galactopyranoside (9).**

Trifluoromethanesulfonic anhydride (0.73 mL, 4.3 mmol) and pyridine (0.75 mL, 9.3 mmol) were added sequentially at  $-10\text{ }^\circ\text{C}$  to a stirred solution of **2a** (0.4 g, 0.72 mmol) in  $CH_2Cl_2$  (20 mL). Then the reaction mixture was gradually warmed to  $10\text{ }^\circ\text{C}$  over 2 h. After complete consumption of starting material, the reaction mixture was diluted with  $CH_2Cl_2$  and washed successively with 1M HCl, aq.  $NaHCO_3$  and brine. Separated organic layer was dried over  $Na_2SO_4$ , and concentrated.

The crude product which was obtained after removal of solvents was dissolved in acetonitrile (30 mL) and to this,  $TBAN_3$  (0.2 g, 0.72 mmol) was added at  $-30\text{ }^\circ\text{C}$  and the reaction was stirred at the same temperature for 20 h. Reaction mixture was concentrated to 4 mL and to this, water (0.28 mL, 15.9 mmol) was added and the reaction mixture was kept for reflux at  $65\text{ }^\circ\text{C}$  for 1 h. The reaction mixture was diluted with EtOAc and washed with water. Separated organic layer was dried over  $Na_2SO_4$  and concentrated *in vacuo*. The crude product was purified by column chromatography on silica gel (1:9 ethyl acetate: pet ether) to obtain **9** as a pale yellowish viscous liquid (0.23 g, 56%):  $[\alpha]_D^{20} -2.5$  ( $c$  0.56,  $CHCl_3$ ); IR ( $CHCl_3$ )  $\nu$  2930, 2857, 2113, 1744, 1472, 1373, 1233, 1112, 758, 703, 504  $cm^{-1}$ ;  $^1H$  NMR (400 MHz,  $CDCl_3$ )  $\delta$  7.65-7.61 (m, 6H, ArH), 7.57-7.37 (m, 6H, ArH), 7.29-7.27 (m, 3H, ArH), 5.43 (d,  $J = 3.2$  Hz, 1H, H-4), 4.46 (d,  $J = 10.0$  Hz, 1H, H-1), 3.80-3.77 (m, 2H, H-3 & H-5), 3.75-3.68 (m, 2H, H-6a & H-6b), 3.48 (t,  $J = 10.0$  Hz, 1H, H-2), 2.01 (s, 3H,  $CH_3$ ), 1.04 (s, 9H,  $(CH_3)_3CSi$ );  $^{13}C$  NMR (100 MHz,  $CDCl_3$ ):  $\delta$  171.7, 135.7, 133.1, 133.0, 132.9, 131.9, 130.08, 130.04, 129.1, 128.3, 128.0, 127.97,

127.96, 86.8, 77.3, 73.5, 69.1, 62.6, 61.6, 26.9, 20.8, 19.2; HR-ESI-MS ( $m/z$ ):  $[M + Na]^+$  calcd. for  $C_{30}H_{35}N_3O_5NaSSi$ , 600.1964; found, 600.1940.

**Phenyl 4-*O*-Acetyl-2-azido-3-*O*-chloroacetyl-2-deoxy-6-*O*-*t*-butyldiphenylsilyl-1-thio- $\beta$ -D-galactopyranoside (10).**

To a clear solution of **9** (0.4 g, 0.69 mmol) in  $CH_2Cl_2$  (4 mL),  $ClAcCl$  (0.16 mL, 2.0 mmol), and pyridine (0.016 mL, 2.0 mmol) were added at 0 °C. After 30 min, the reaction mixture was concentrated *in vacuo* and chromatographed on silica gel (8% ethyl acetate: pet ether) to obtain desired product **10** as a foam (0.38 g, 85%):  $[\alpha]_D^{20}$  -21.0 ( $c$  0.63,  $CHCl_3$ ); IR ( $CHCl_3$ )  $\nu$  3019, 2929, 2126, 1745, 1216, 1045, 760, 670  $cm^{-1}$ ;  $^1H$  NMR (400 MHz,  $CDCl_3$ )  $\delta$  7.63-7.55 (m, 6H, ArH), 7.46-7.36 (m, 6H, ArH), 7.35-7.27 (m, 3H, ArH), 5.52 (d,  $J = 3.0$  Hz, 1H, H-4), 4.92 (dd,  $J = 10.0, 3.0$  Hz, 1H, H-3), 4.51 (d,  $J = 10.0$  Hz, 1H, H-1), 4.03 (d,  $J = 1.4$  Hz, 2H,  $CH_2$  of  $ClAc$ ), 3.80-3.74 (m, 2H), 3.66-3.60 (m, 2H), 1.96 (s, 3H,  $CH_3$ ), 1.07 (s, 9H,  $(CH_3)_3CSi$ );  $^{13}C$  NMR (100 MHz,  $CDCl_3$ )  $\delta$  170.2, 166.4, 135.76, 135.75, 133.4, 132.9, 132.8, 131.4, 130.0, 129.2, 128.6, 128.0, 86.9, 77.1, 75.2, 66.3, 61.4, 59.7, 40.6, 26.8, 20.7, 19.2; HR-ESI-MS ( $m/z$ ):  $[M + Na]^+$  calcd. for  $C_{32}H_{36}N_3O_6NaSSiCl$ , 676.1680; found, 676.1728.

**Phenyl 4-*O*-Acetyl-2-azido-3-*O*-chloroacetyl-2-deoxy-1-thio- $\beta$ -D-galactopyranoside (11).**

A solution of TBAF (0.18 mL, 0.18 mmol) and AcOH (20  $\mu$ L, 0.35 mmol) with pH 7 was added at 0 °C to a solution of **10** (24 mg, 0.035 mmol) in THF (1 mL) and the reaction mixture was stirred at the same temperature overnight. After complete consumption of starting material solvents were removed *in vacuo* and the residue was chromatographed on silica gel (40% ethyl acetate: pet ether) to obtain **11** as a pale yellowish liquid (12 mg, 82%):  $[\alpha]_D^{20}$  -12.2 ( $c$  0.36,  $CHCl_3$ ); IR ( $CHCl_3$ )  $\nu$  2926, 2854, 2114, 1745, 1375, 1232, 1077, 758  $cm^{-1}$ ;  $^1H$  NMR (400 MHz,  $CDCl_3$ )  $\delta$  7.61-

7.58 (m, 2H, ArH), 7.37-7.35 (m, 3H, ArH), 5.36 (d,  $J = 3.2$  Hz, 1H, H-4), 4.93 (dd,  $J = 10.0, 3.2$  Hz, 1H, H-3), 4.56 (d,  $J = 10.0$  Hz, 1H, H-1), 4.03 (d,  $J = 1.8$  Hz, 2H, CH<sub>2</sub> of ClAc), 3.78-3.69 (m, 3H), 3.53-3.50 (m, 1H), 2.11 (s, 3H, CH<sub>3</sub>); <sup>13</sup>C NMR (100 MHz, CDCl<sub>3</sub>)  $\delta$  171.0, 166.4, 133.6, 131.0, 129.3, 128.9, 86.8, 77.4, 74.8, 67.1, 61.0, 59.8, 40.5, 20.7; HR-ESI-MS ( $m/z$ ): [M + Na]<sup>+</sup> calcd. for C<sub>16</sub>H<sub>18</sub>N<sub>3</sub>O<sub>6</sub>NaSCl, 438.0503; found, 438.0509.

**Phenyl 2-Azido-3-O-benzoyl-2,4,6-trideoxy-4-phthalimido- $\alpha$ -D-galactopyranosyl-(1 $\rightarrow$ 4)-3-O-acetyl-2-azido-2-deoxy-6-O-*t*-butyldiphenylsilyl-1-thio- $\beta$ -D-galactopyranoside (13).** Bromine (26  $\mu$ L, 0.49 mmol) was added to a solution of **12** (0.11 g, 0.22 mmol) in CH<sub>2</sub>Cl<sub>2</sub> (3 mL) at 0 °C. After 90 min, toluene was added, the mixture was concentrated and the residue was co-evaporated twice with toluene.

A solution of acceptor **6a** (65 mg, 0.11 mmol) in CH<sub>2</sub>Cl<sub>2</sub> (1 mL) was added to a suspension of glycosyl bromide, 3 Å MS (0.25 g) and sym. collidine (28  $\mu$ L, 0.2 mmol) in CH<sub>2</sub>Cl<sub>2</sub> (1 mL) and kept stirring at -30 °C for 30 min. Then, silver triflate (0.11 g, 0.45 mmol) was added and stirring was continued at the same temperature. After 2 h, triethylamine was added and the reaction mixture was diluted with CH<sub>2</sub>Cl<sub>2</sub>, filtered through celite, and concentrated. The residue was purified by column chromatography on silica gel (20% ethyl acetate: pet ether) to obtain the desired product **13** as a foam (57 mg, 81%):  $[\alpha]_D^{20} +184.2$  ( $c$  1.67, CHCl<sub>3</sub>); IR (CHCl<sub>3</sub>)  $\nu$  2930, 2857, 2111, 1720, 1365, 1329, 1266, 1218, 1106, 1067, 758, 724, 504 cm<sup>-1</sup>; <sup>1</sup>H NMR (400 MHz, CDCl<sub>3</sub>)  $\delta$  7.90-7.88 (m, 2H, ArH), 7.81 (bs, 2H, ArH) 7.73-7.62 (m, 9H, ArH), 7.52-7.29 (m, 11H, ArH), 5.48 (dd,  $J = 11.0, 6.7$  Hz, 1H, H-3'), 5.19 (d,  $J = 4.0$  Hz, 1H, H-1'), 5.06 (d,  $J = 6.7, 3.7$  Hz, 1H, H-4'), 4.88 (dd,  $J = 11.0, 4.0$  Hz, 1H, H-2'), 4.83 (dd,  $J = 10.0, 2.6$  Hz, 1H, H-3), 4.40 (d,  $J = 10.0$  Hz, 1H, H-1), 4.29 (qd,  $J = 6.5, 3.7$  Hz, 1H, H-5'), 4.27 (d,  $J = 2.6$  Hz, 1H, H-4), 4.13-4.10 (m, 1H, H-

6b), 4.08-3.94 (m, 1H, H-6a), 3.64-3.57 (m, 2H, H-2, H-5), 2.13 (s, 3H, CH<sub>3</sub>), 1.09 (s, 9H, (CH<sub>3</sub>)<sub>3</sub>CSi), 0.98 (d, *J* = 6.5 Hz, 3H, CH<sub>3</sub>); <sup>13</sup>C NMR (100 MHz, CDCl<sub>3</sub>) δ 170.1, 168.7, 165.1, 135.8, 135.7, 134.6, 134.3, 133.7, 133.1, 130.2, 130.17, 130.10, 129.8, 129.2, 128.9, 128.6, 128.1, 128.0, 123.7, 99.0, 85.7, 79.0, 74.8, 73.6, 70.1, 63.9, 61.6, 60.0, 59.5, 52.0, 27.0, 21.3, 19.3, 16.7; HR-ESI-MS (*m/z*): [M + Na]<sup>+</sup> calcd. for C<sub>51</sub>H<sub>51</sub>N<sub>7</sub>O<sub>10</sub>NaSSi, 1004.3085; found, 1004.3015.

***N*-(Benzyloxycarbonyl)-*O*-(4-*O*-acetyl-2-azido-3-*O*-chloroacetyl-2-deoxy-6-*O*-*t*-butyldiphenylsilyl- $\alpha$ -D-galactopyranosyl)-L-serine methylester (**15**).**

Tf<sub>2</sub>O (19  $\mu$ L, 0.11 mmol) was added at -60 °C to a cooled solution of **10** (0.05 g, 0.08 mmol) and Ph<sub>2</sub>SO (0.05 g, 0.22 mmol) in CH<sub>2</sub>Cl<sub>2</sub> (4 mL). After 10 min, L-serine derivative **14** (0.04 g, 0.16 mmol) in CH<sub>2</sub>Cl<sub>2</sub> (1 mL) was added slowly. After stirring the reaction mixture at the same temperature for 1 h, it was diluted with CH<sub>2</sub>Cl<sub>2</sub> and washed with aq. NaHCO<sub>3</sub> and brine. Separated organic layer dried over Na<sub>2</sub>SO<sub>4</sub>, concentrated and chromatographed on silica gel (25% ethyl acetate: pet ether) to afford the desired product **15** as a foam (0.05 g, 74%): [ $\alpha$ ]<sub>D</sub><sup>20</sup> +52.6 (*c* 1.83, CHCl<sub>3</sub>); IR (CHCl<sub>3</sub>)  $\nu$  3018, 2929, 2113, 1749, 1216, 1046, 759, 668 cm<sup>-1</sup>; <sup>1</sup>H NMR (400 MHz, CDCl<sub>3</sub>) δ 7.63-7.58 (m, 5H, ArH), 7.44-7.31 (m, 10H, ArH), 5.66 (d, *J* = 8.4 Hz, 1H, NH), 5.59 (d, *J* = 3.2 Hz, 1H, H-4), 5.36 (dd, *J* = 11.0, 3.2 Hz, 1H, H-3), 5.09 (ABq, *J* = 11.3, 5.4 Hz, 2H, CH<sub>2</sub>), 4.91 (d, *J* = 3.6 Hz, 1H, H-1), 4.58-4.55 (m, 1H, -CH), 4.09-4.02 (m, 5H, H-5, -CH<sub>2</sub>, -CH<sub>2</sub>), 3.79 (s, 3H), 3.75-3.63 (m, 1H, H-6a), 3.61-3.54 (m, 2H, H-2, H-6b), 1.98 (s, 3H, CH<sub>3</sub>), 1.01 (s, 9H, (CH<sub>3</sub>)<sub>3</sub>CSi); <sup>13</sup>C NMR (100 MHz, CDCl<sub>3</sub>) δ 170.3, 170.2, 166.4, 156.2, 136.1, 135.72, 135.71, 132.9, 132.8, 130.8, 130.08, 130.05, 128.7, 128.4, 128.3, 128.0, 99.2, 70.3, 69.5, 67.4, 67.2, 61.2, 57.6, 54.4, 53.0, 40.6 26.8, 20.7, 19.1; HRMS calcd for C<sub>38</sub>H<sub>46</sub>O<sub>11</sub>SiClN<sub>4</sub> [M + H]<sup>+</sup> 797.2621, found 797.2600.

***N*-(Benzyloxycarbonyl)-*O*-(4-*O*-acetyl-2-azido-2-deoxy-6-*O*-*t*-butyldiphenylsilyl)- $\alpha$ -D-galactopyranosyl)-L-serine methylester (**16**).**

Thiourea (0.15 g, 1.9 mmol) was added to a clear solution of **15** (0.23 g, 0.28 mmol) in pyridine (2.8 mL) and EtOH (2.8 mL) and the reaction mixture was kept for reflux at 80 °C. After 30 min, solvents were removed and the crude product was chromatographed on silica gel (30% ethyl acetate: pet ether) to afford **16** as a viscous liquid (0.15 g, 78%):  $[\alpha]_D^{20} +30.2$  (*c* 1.06, CHCl<sub>3</sub>); IR (CHCl<sub>3</sub>)  $\nu$  3018, 2975, 2112, 1735, 1427, 1216, 1047, 758, 669 cm<sup>-1</sup>; <sup>1</sup>H NMR (400 MHz, CDCl<sub>3</sub>)  $\delta$  7.63-7.59 (m, 5H, ArH), 7.42-7.31 (m, 10H, ArH), 5.68 (d, *J* = 8.4 Hz, 1H, NH), 5.47 (d, *J* = 3.0 Hz, 1H, H-4), 5.12-5.03 (m, 2H, -CH<sub>2</sub>), 4.86 (d, *J* = 3.6 Hz, 1H, H-1), 4.57-4.55 (m, 1H, -CH), 4.22 (dd, *J* = 10.6, 3.0 Hz, 1H, H-3), 4.02-3.90 (m, 3H, H-5, -CH<sub>2</sub>), 3.78 (s, 3H, CH<sub>3</sub>), 3.74-3.58 (m, 2H, H-6a, H-6b), 3.40 (dd, *J* = 10.6, 3.6 Hz, 1H, H-2), 2.01 (s, 3H, CH<sub>3</sub>), 1.02 (s, 9H, (CH<sub>3</sub>)<sub>3</sub>CSi); <sup>13</sup>C NMR (100 MHz, CDCl<sub>3</sub>)  $\delta$  171.7, 170.4, 156.1, 135.7, 133.0, 132.9, 130.1, 130.0, 128.7, 128.4, 128.3, 128.0, 99.3, 70.1, 69.7, 69.4, 67.5, 67.4, 61.4, 60.2, 54.4, 53.0, 26.8, 20.9, 19.2; HRMS calcd for C<sub>36</sub>H<sub>44</sub>O<sub>10</sub>SiN<sub>4</sub> [M + Na]<sup>+</sup> 743.2719, found 743.2706.

***N*-(Benzyloxycarbonyl)-*O*-(4-*O*-acetyl-2-azido-3-*O*-chloroacetyl-2-deoxy- $\alpha$ -D-galactopyranosyl)-L-serine methylester (**17**).**

A solution of TBAF (4.2 mL, 4.2 mmol) and AcOH (0.48 mL, 8.27 mmol) with pH 7 was added at 0 °C to a clear solution of **15** (0.156 g, 0.195 mmol) in THF (22 mL) and the reaction mixture was stirred at the same temperature overnight. After complete consumption of starting material, solvents were removed in vacuum and chromatographed to obtain **17** as a pale yellowish liquid (0.33 mg, 72%):  $[\alpha]_D^{20} +126.5$  (*c* 6.63, CHCl<sub>3</sub>); IR (CHCl<sub>3</sub>)  $\nu$  3016, 2955, 2113, 1746, 1524, 1438, 1235, 1068, 754, 667 cm<sup>-1</sup>; <sup>1</sup>H NMR (400 MHz, CDCl<sub>3</sub>)  $\delta$  7.38-7.30 (m, 5H, ArH), 6.02 (d,

$J = 8.0$  Hz, 1H, NH), 5.40 (d,  $J = 3.0$  Hz, 1H, H-4), 5.32 (dd,  $J = 11.0, 3.0$  Hz, 1H, H-3), 5.12 (s, 2H, -CH<sub>2</sub>), 5.01 (d,  $J = 3.4$  Hz, 1H, H-1), 4.58-4.56 (m, 1H, -CH), 4.15-4.04 (m, 5H, H-5, -CH<sub>2</sub>, -CH<sub>2</sub>), 3.78 (s, 3H, CH<sub>3</sub>), 3.74-3.73 (m, 2H, H-2, H-6a), 3.65-3.57 (m, 1H, H-6b), 2.12 (s, 3H, CH<sub>3</sub>); <sup>13</sup>C NMR (100 MHz, CDCl<sub>3</sub>)  $\delta$  170.9, 170.4, 166.5, 156.1, 136.2, 128.7, 128.3, 99.2, 70.7, 69.8, 69.7, 67.9, 67.4, 60.9, 57.6, 54.5, 53.1, 40.6, 20.8; HRMS calcd for C<sub>22</sub>H<sub>27</sub>O<sub>11</sub>ClN<sub>4</sub> [M + Na]<sup>+</sup> 581.1263, found 581.1269.

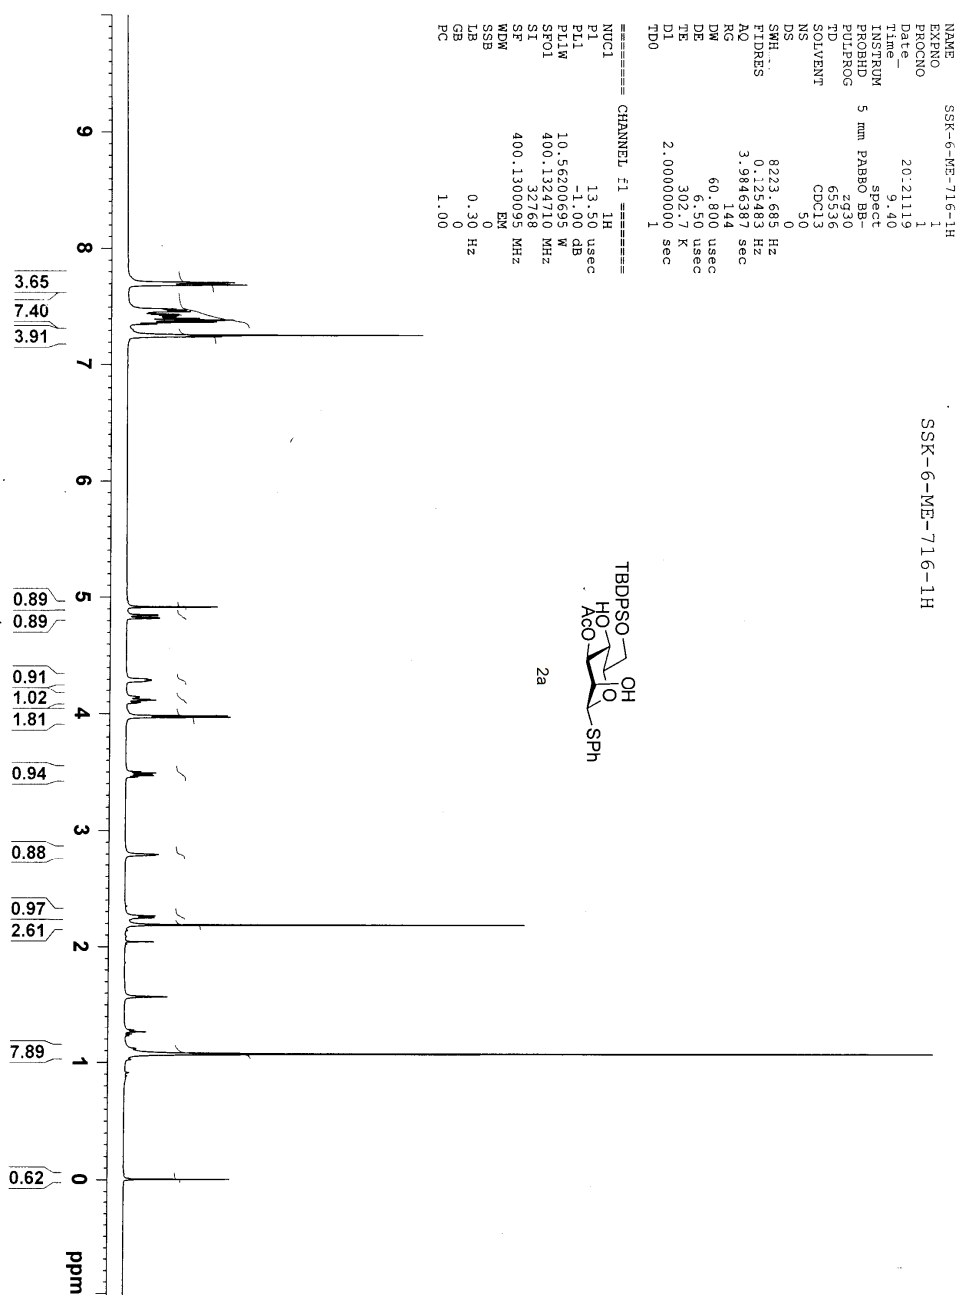



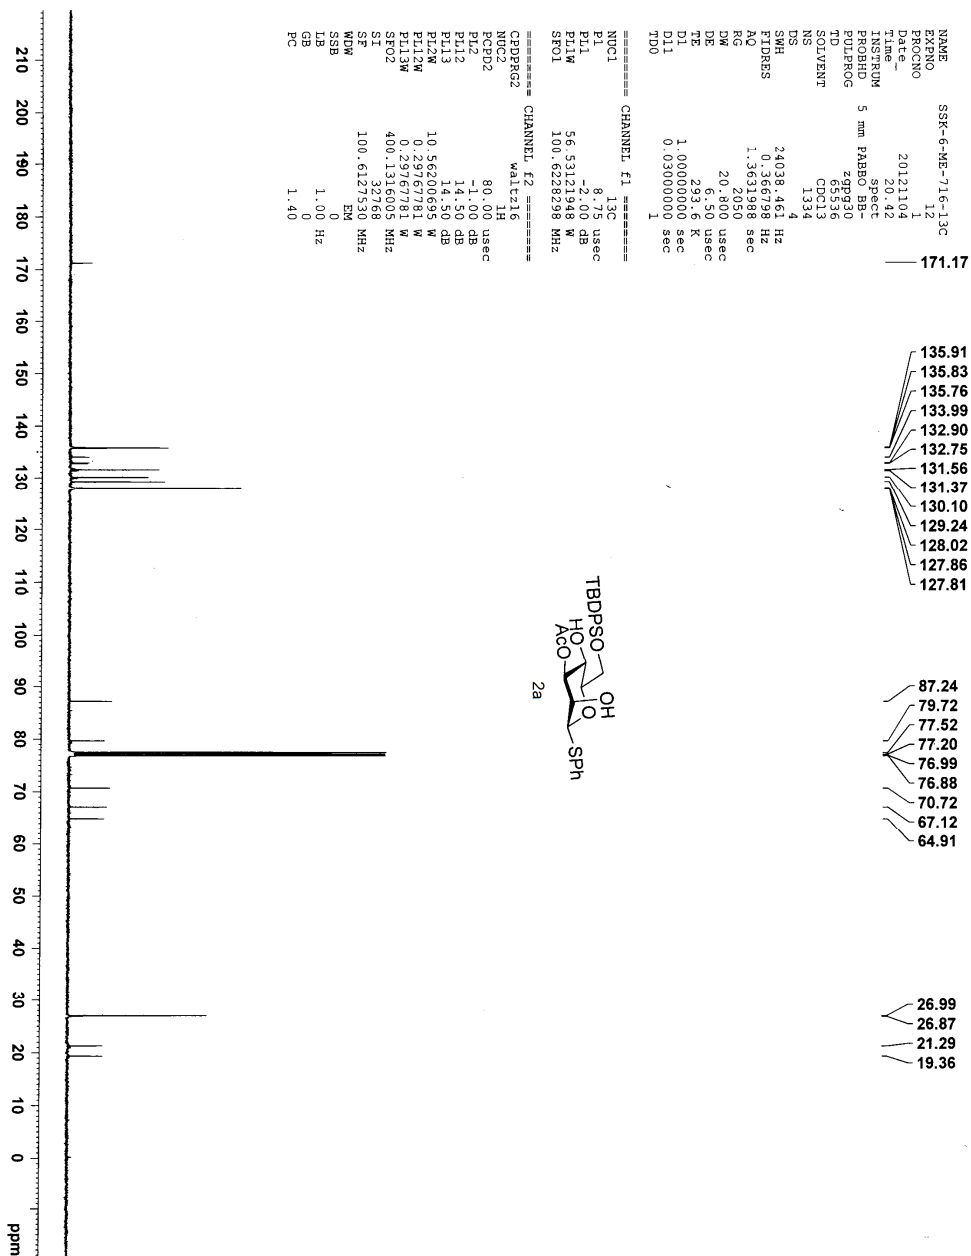

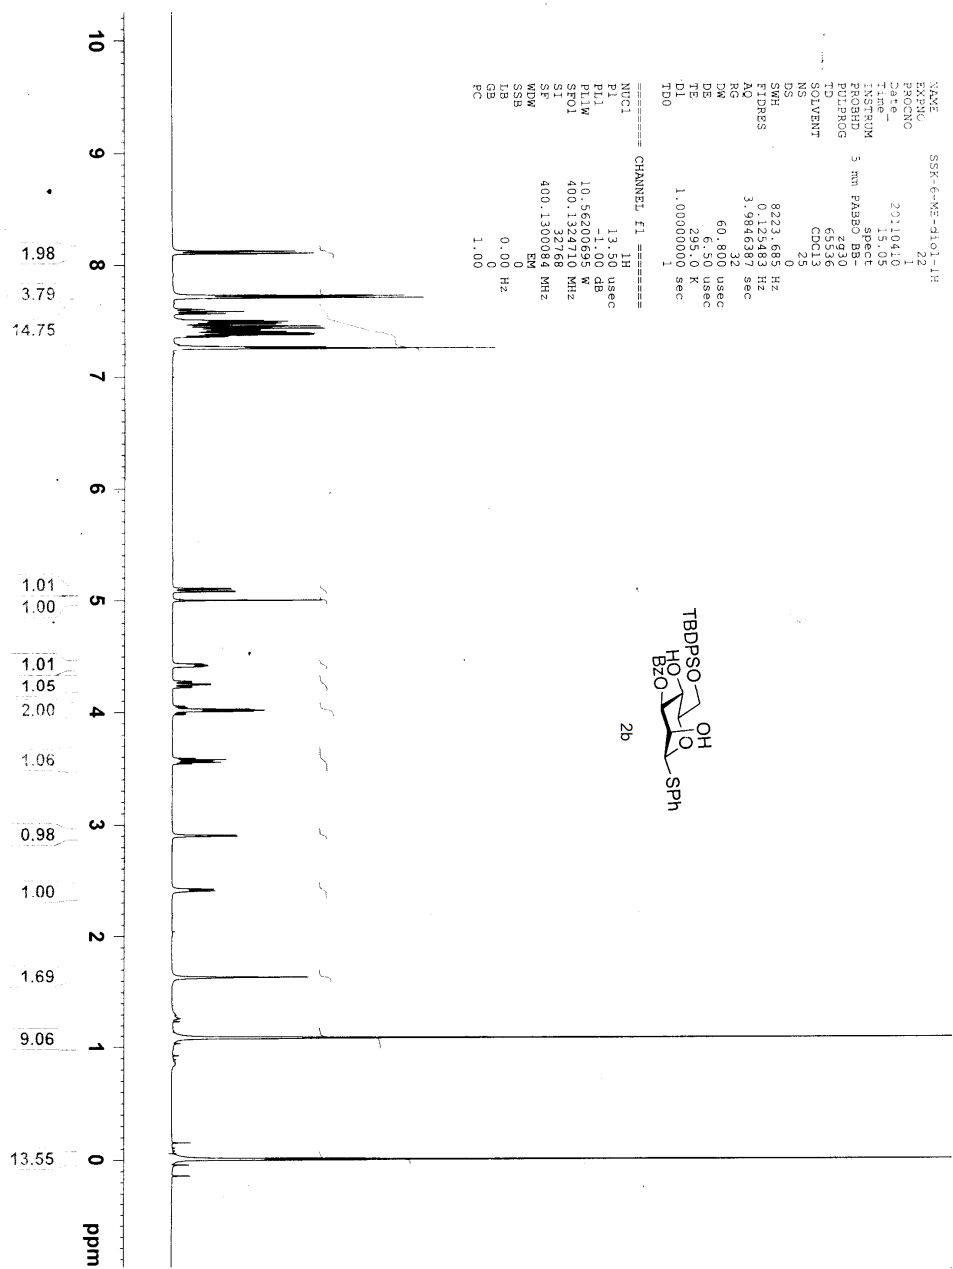

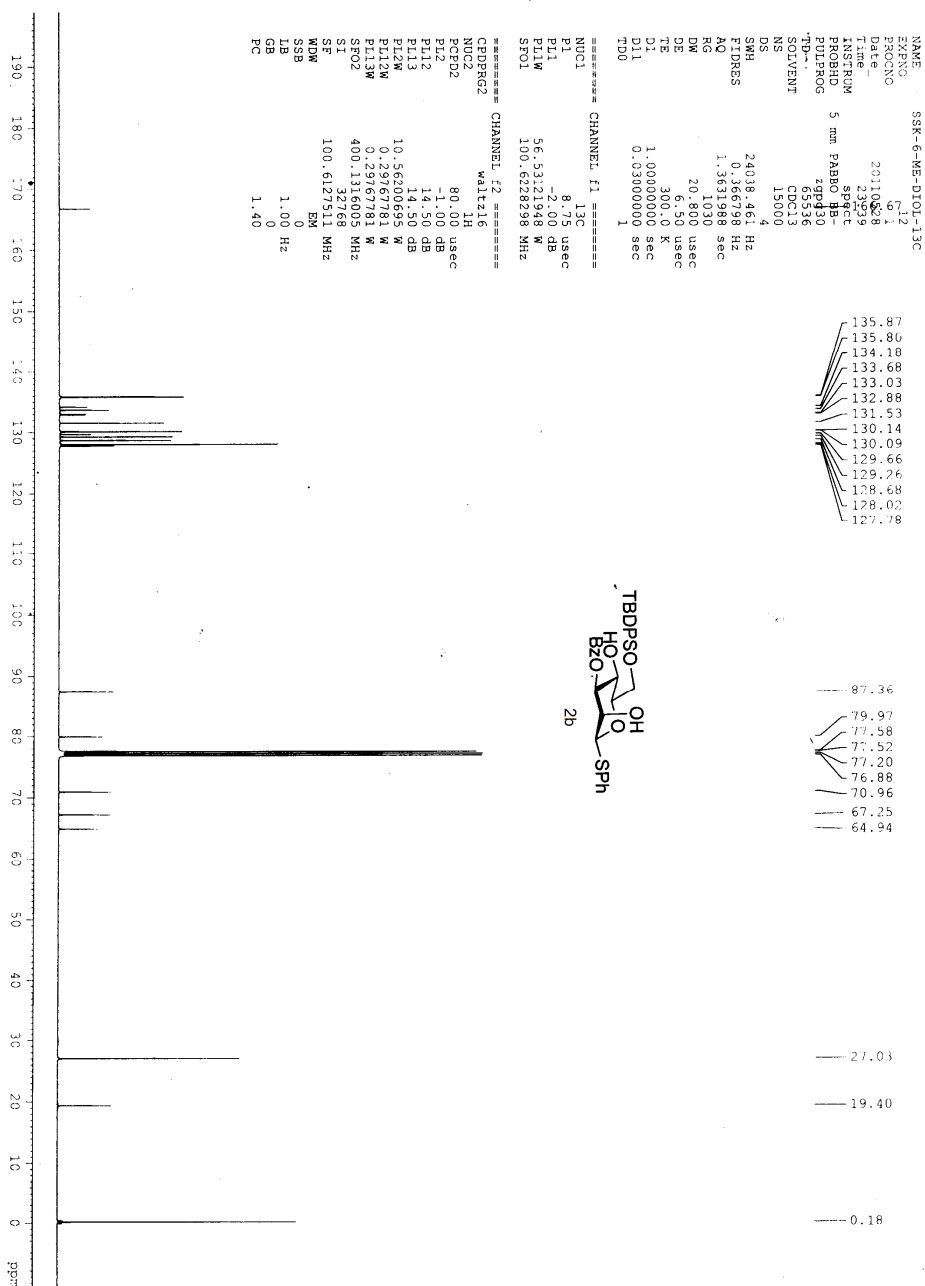

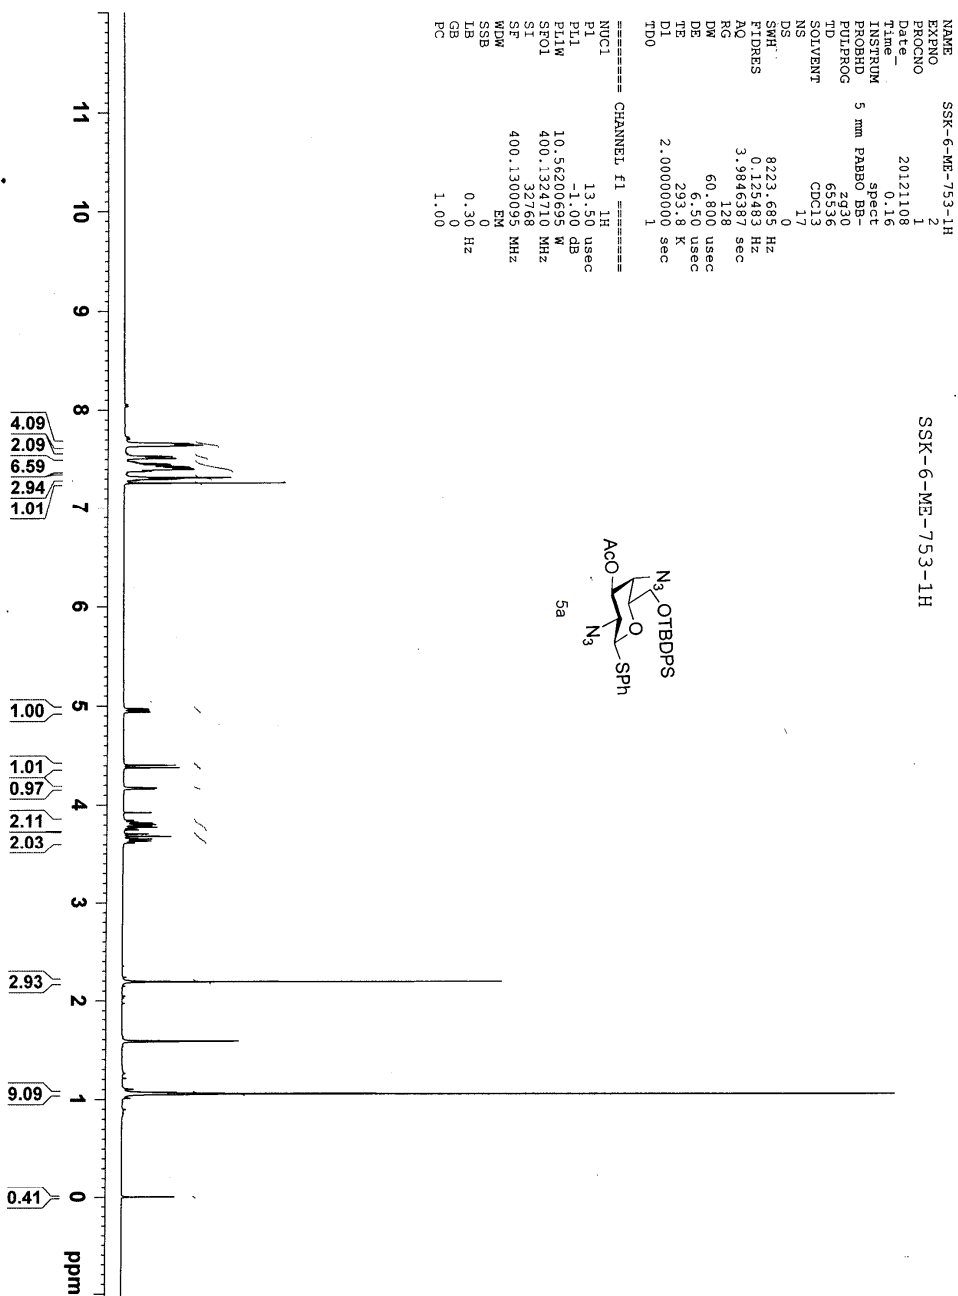

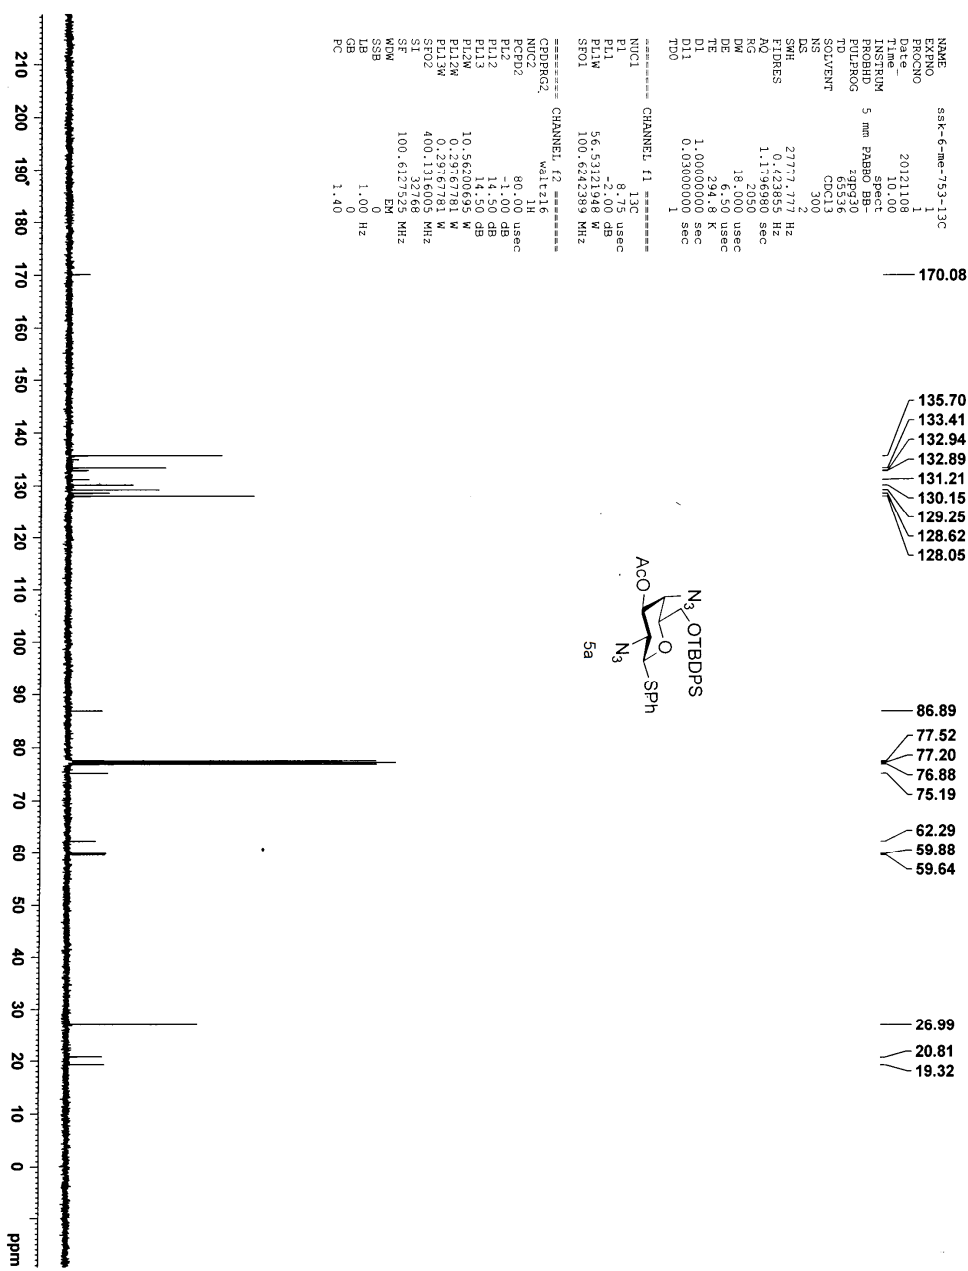

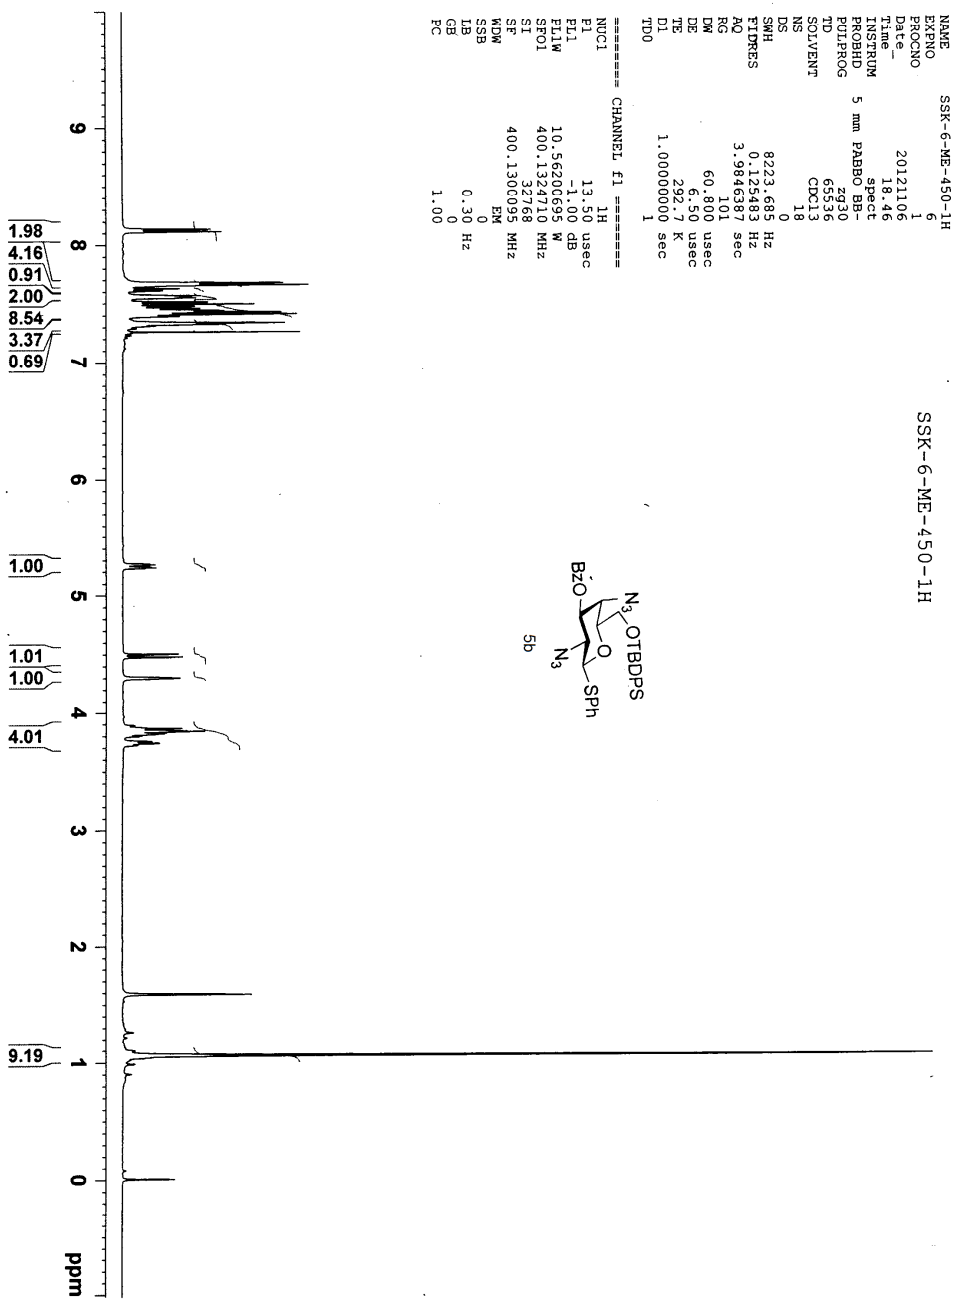

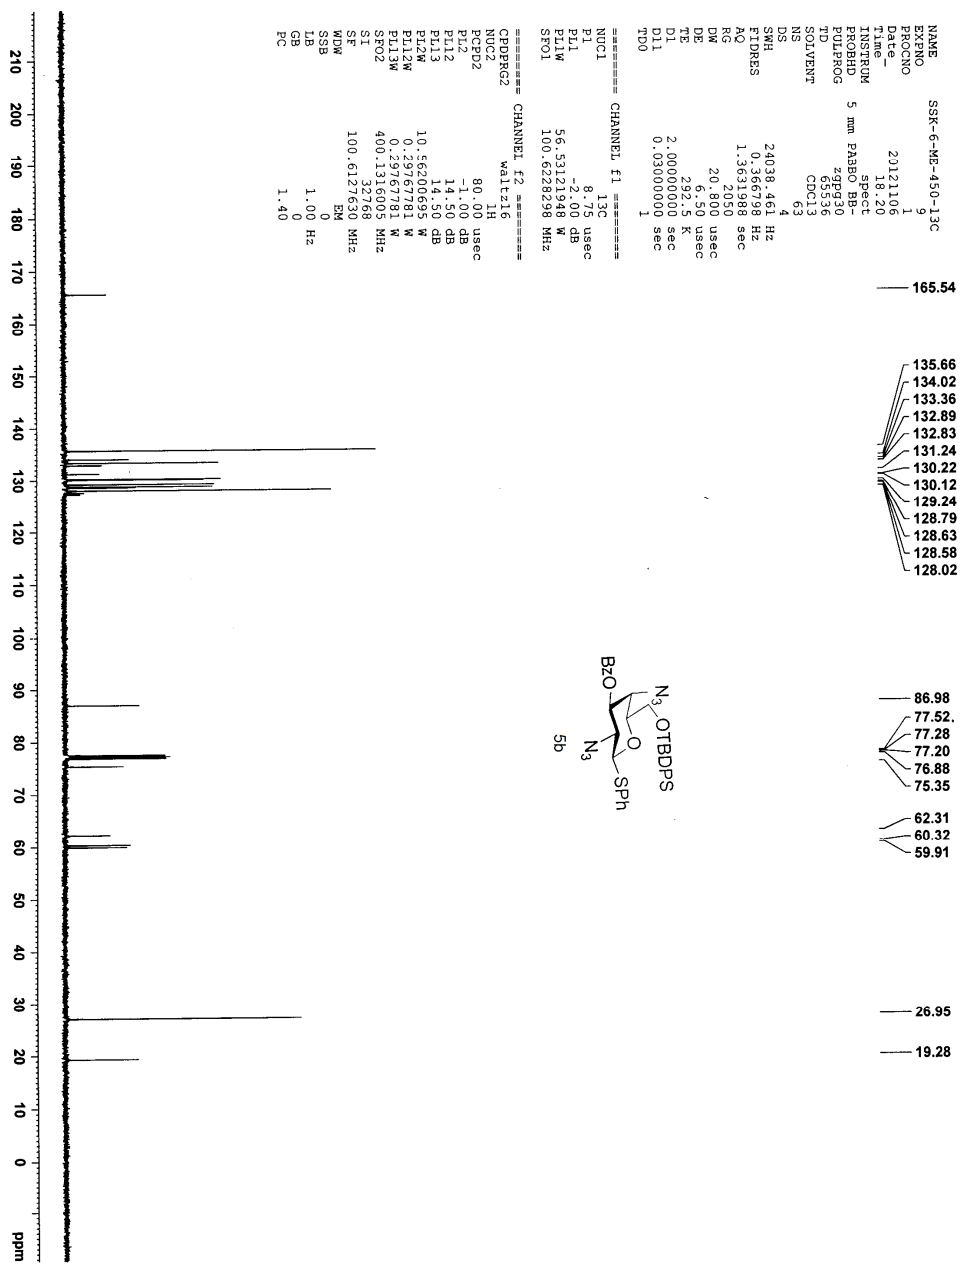

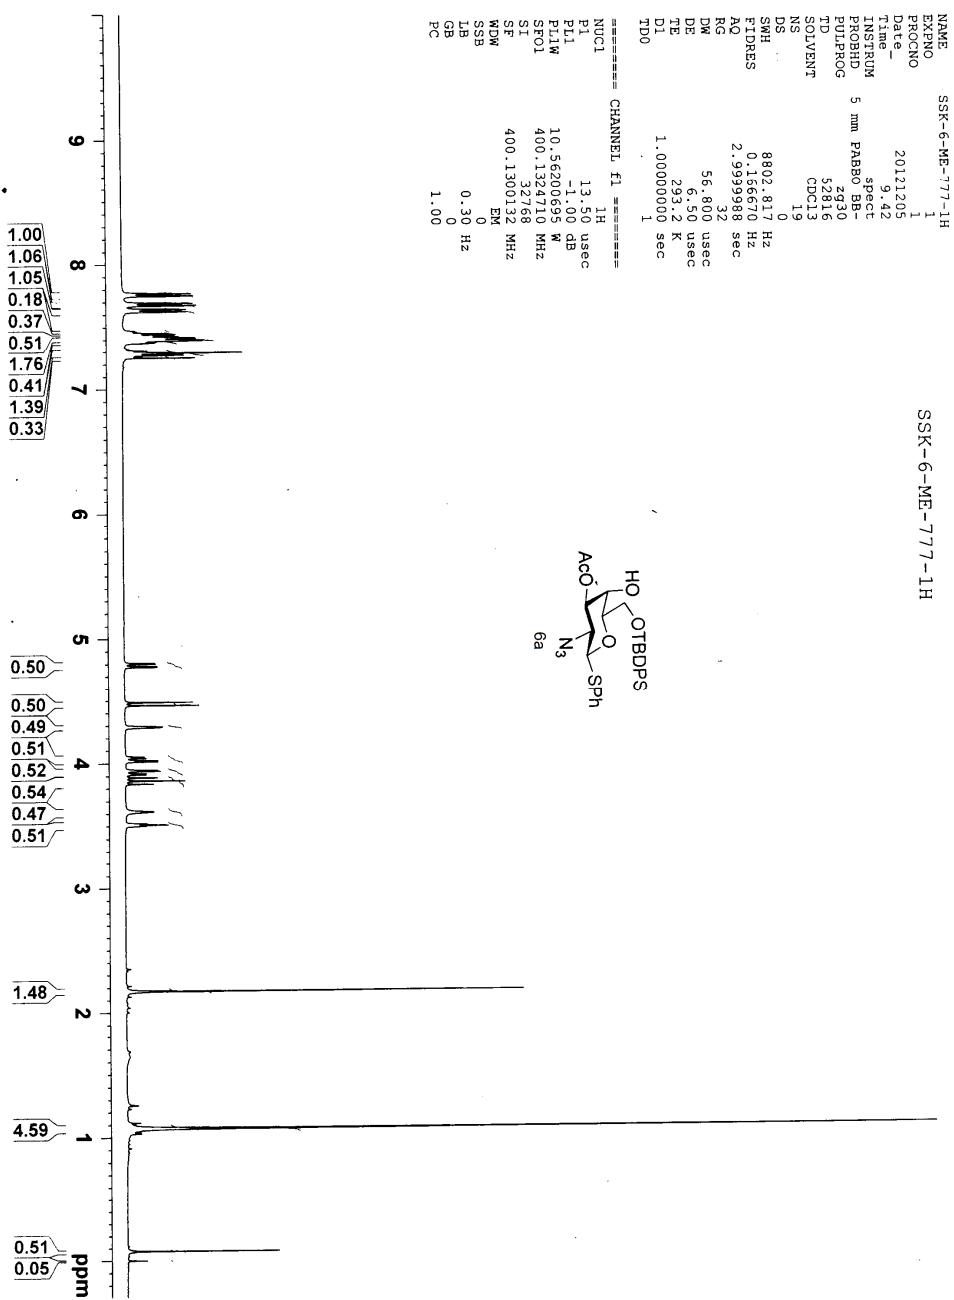



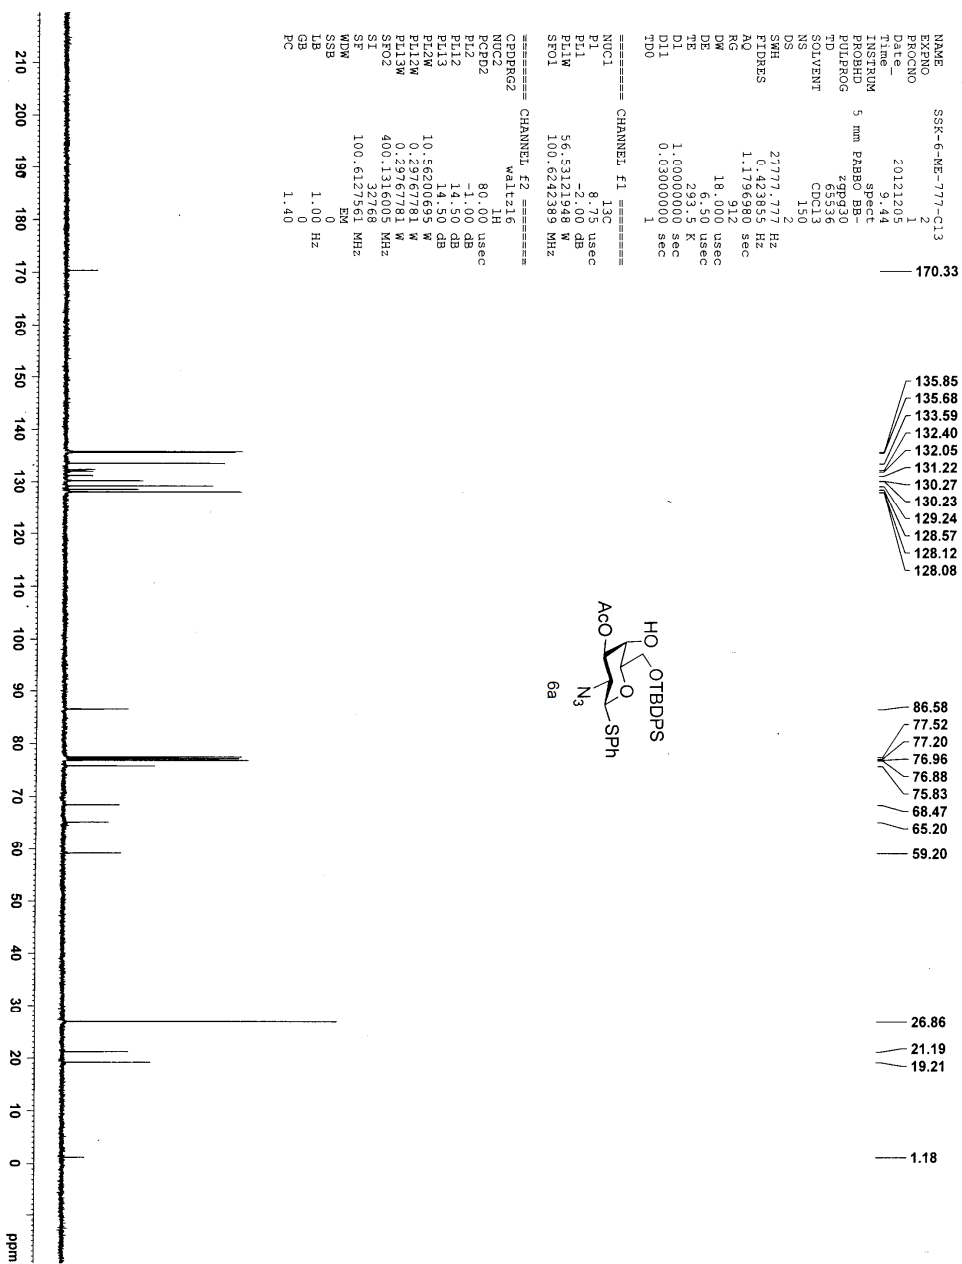

SSK-6-ME-186  
Data Collected on: quantum-mercury300  
Archive directory: /export/home/vnmr1/vnmrSYS/data  
Sample directory: SSK-6-ME-186\_2011-01-18  
F1: gcosy\_01  
Pulse Sequence: gcosy  
Solvent: CDCl3  
Relax: d430v 1.000 sec  
Acq. time: 15.000 sec  
Width: 3003.0 Hz  
2D Width: 3003.0 Hz  
2D Repetitions: 20  
OBSERVE: H1 299.9475048 MHz  
DATA PROCESSING  
Sf4: sine f0el1 0.075 sec  
F2: sine f0el1 0.067 sec  
Sf: sine bel1 0.067 sec  
F1: sine bel1 0.067 sec  
FT size: 2048 x 2048  
Total time: 1 hr, 6 min

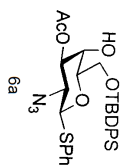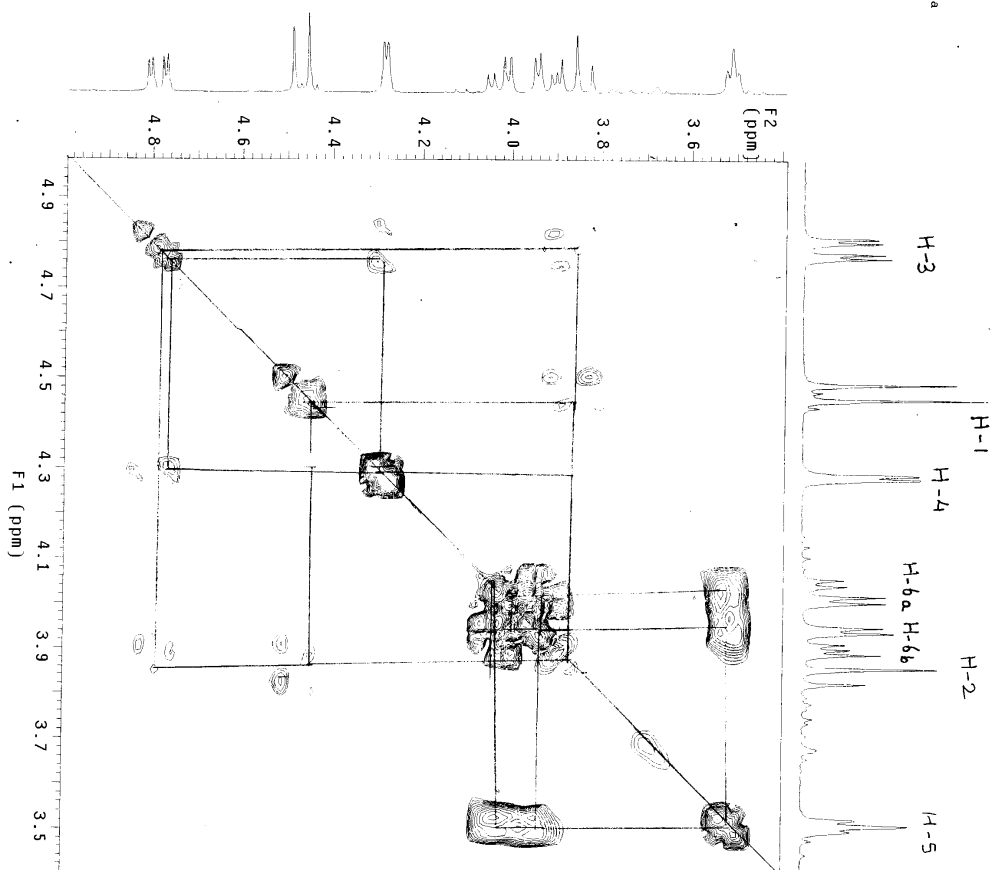

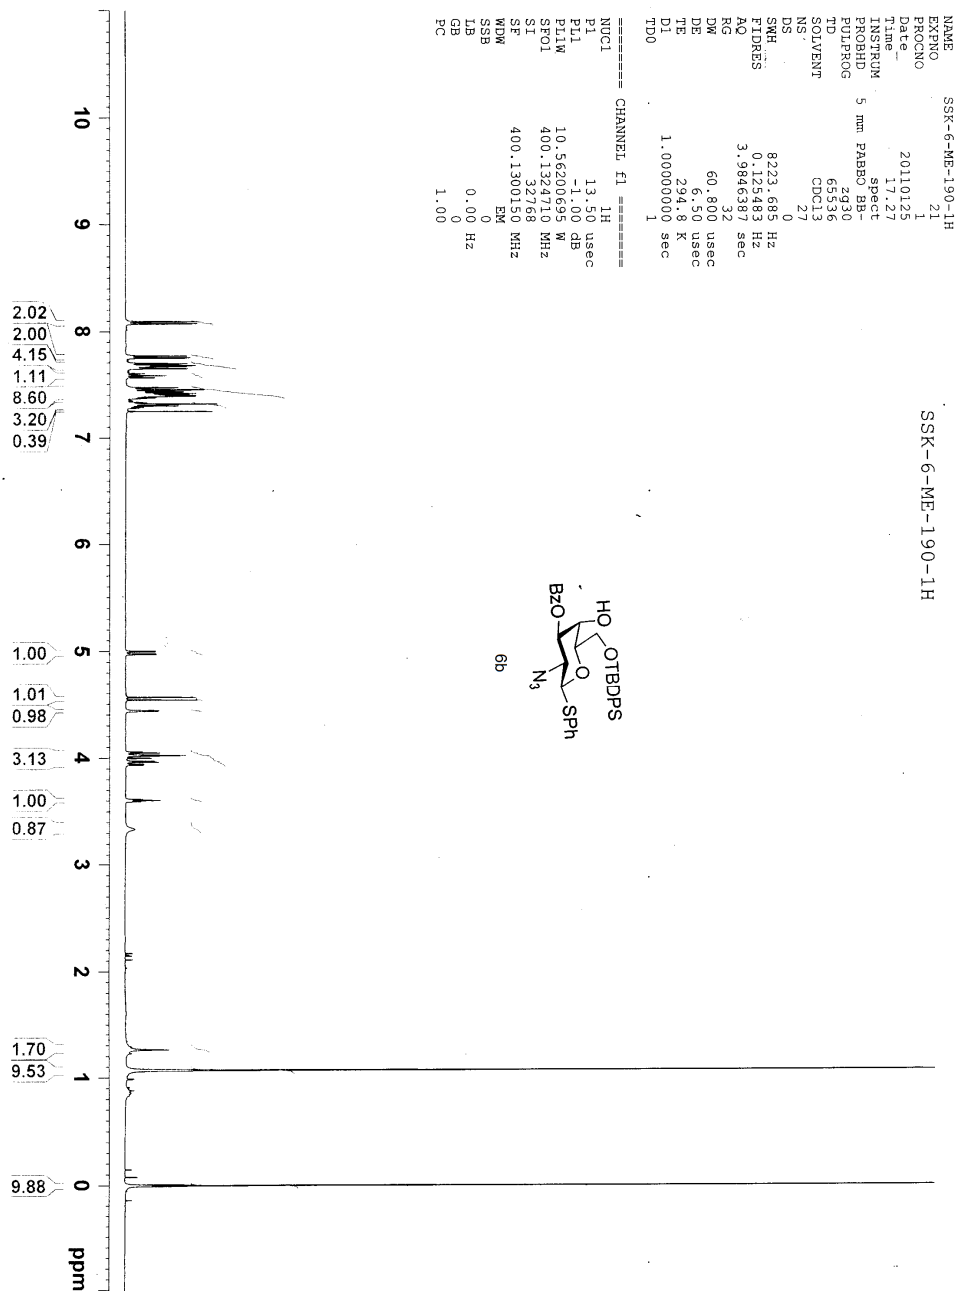

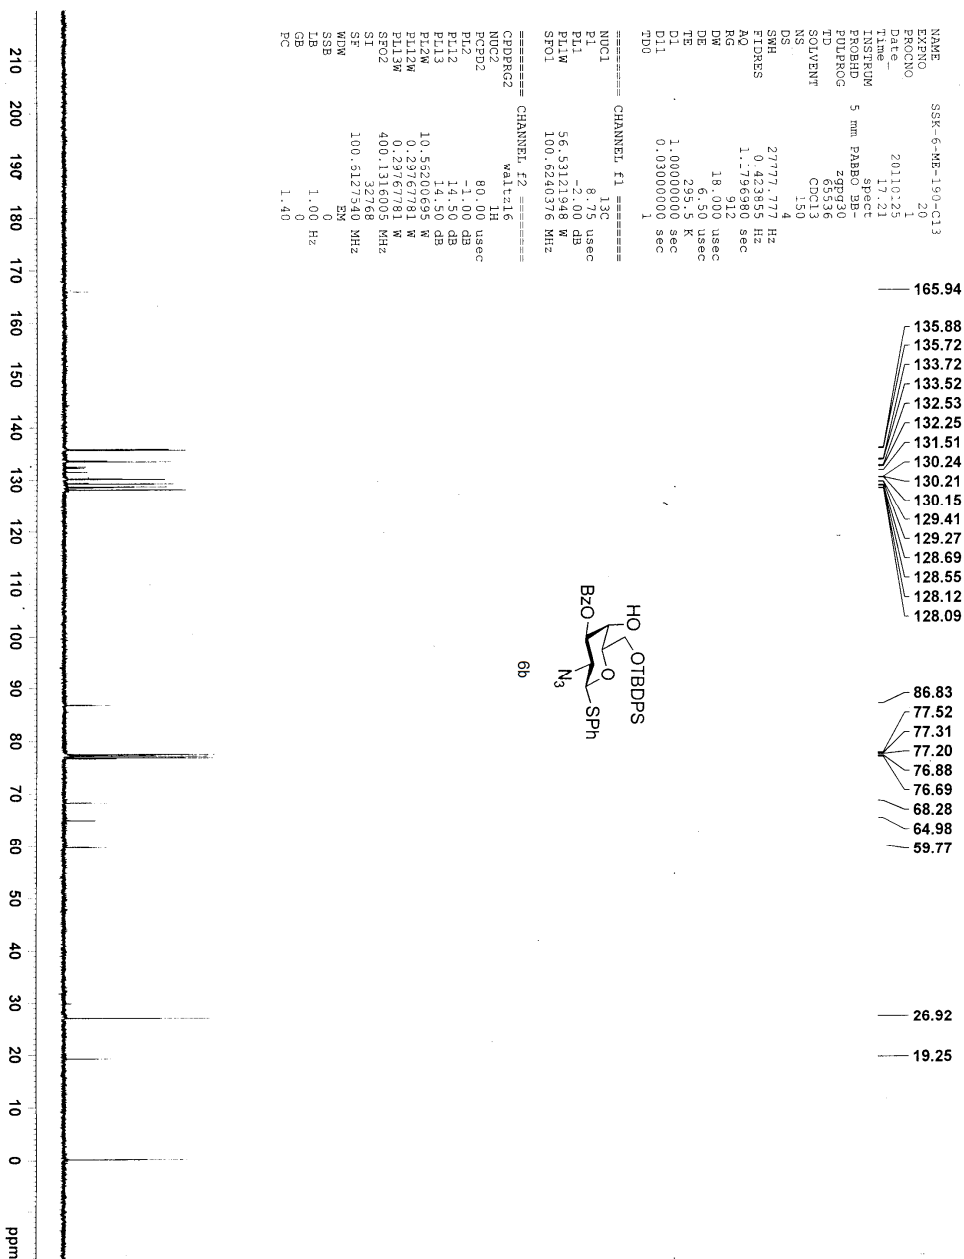

SSK-6-ME-190

exp2 gc05Y

| SAMPLE      |              | F1A05 |            |
|-------------|--------------|-------|------------|
| date        | Mar 2 2011   | hs    | mm         |
| solvent     | CDCl3        | hspl1 | n          |
| sample      | SSK-6-ME-190 | hspl1 | 1005       |
| acquisition | 3003.0       | temp  | not used   |
| sw          | 3003.0       | gain  | not used   |
| at          | 0.150        | sp1   | 22         |
| ft          | not used     | f2    | PROCESSING |
| ss          | 16           | sbs   | not used   |
| d1          | 1.000        | fn    | not used   |
| md          | 3003.0       | sb1   | not used   |
| sw1         | 3003.0       | procl | not used   |
| ni          | 512          | prcl  | 1p         |
| ps          | not used     | prcl  | 1p         |
| satpwr      | 0            | sp    | 823.0      |
| satdly      | 0            | wp    | 759.5      |
| satpwr      | 0            | sp1   | 828.8      |
| tn          | 1            | sp1   | 728.8      |
| stf1q       | 299.949      | rfp   | 168.0      |
| lof         | -113.1       | rf11  | 168.3      |
| tpwr        | 10.000       | rfp1  | 0          |
| pw          | 10.000       | wc    | 124.0      |
| g21v11      | 1005         | sc    | 6.2        |
| g11ab       | 0.001000     | wc2   | 124.0      |
| g31ab       | 0.000500     | sc2   | 1428       |
| da          | C13          | th    | 11         |
| dm          | mm           | at    | cdc        |
|             |              | av    |            |

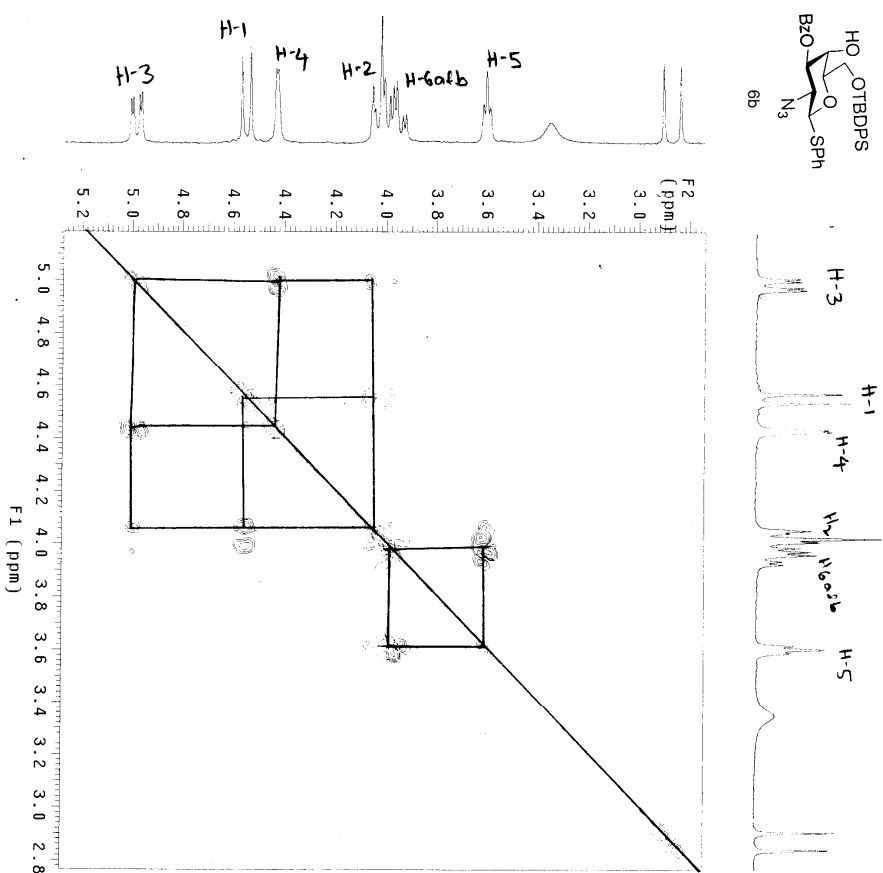

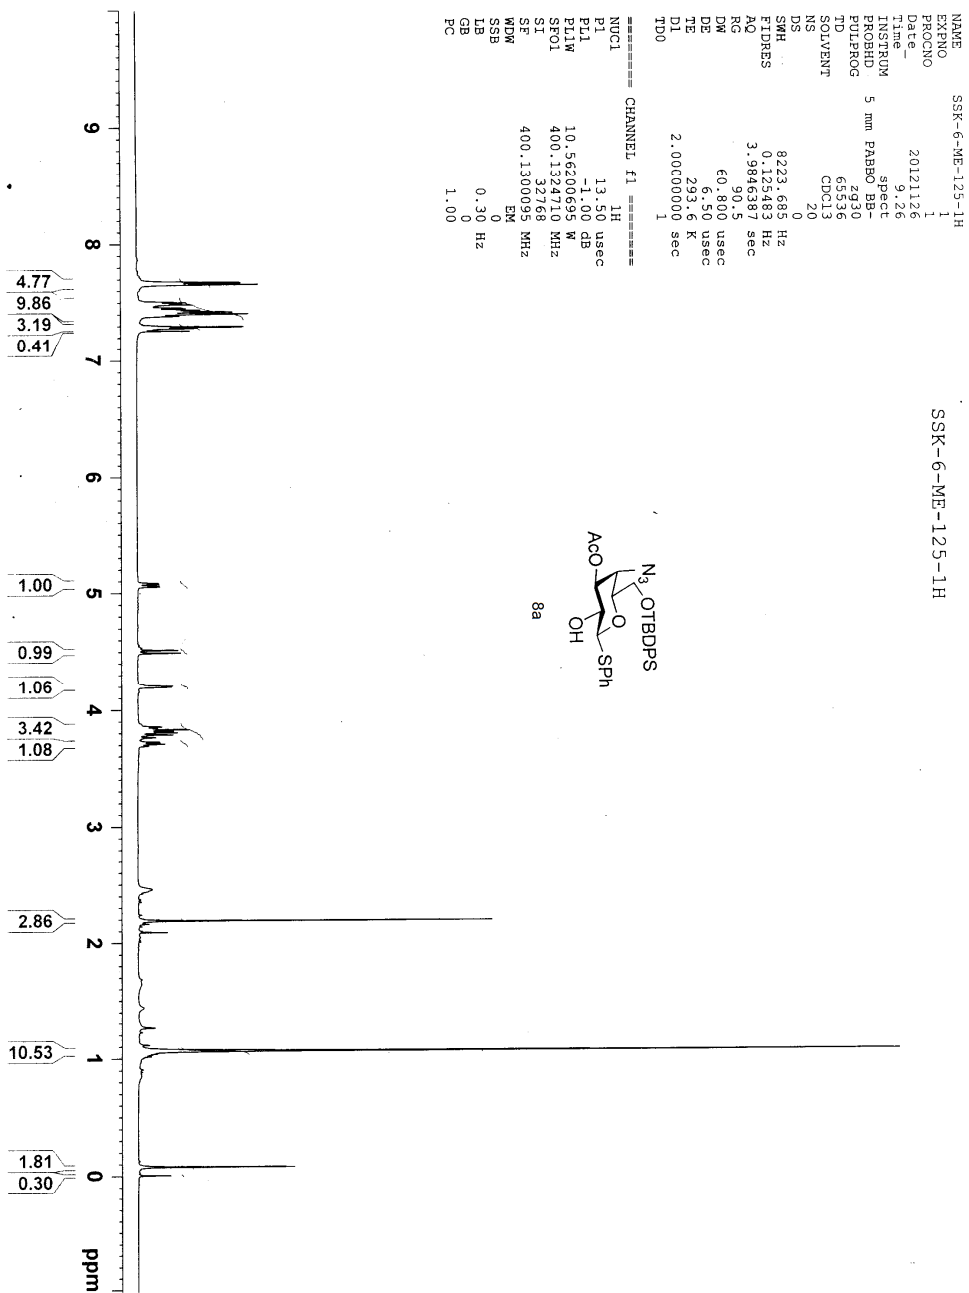

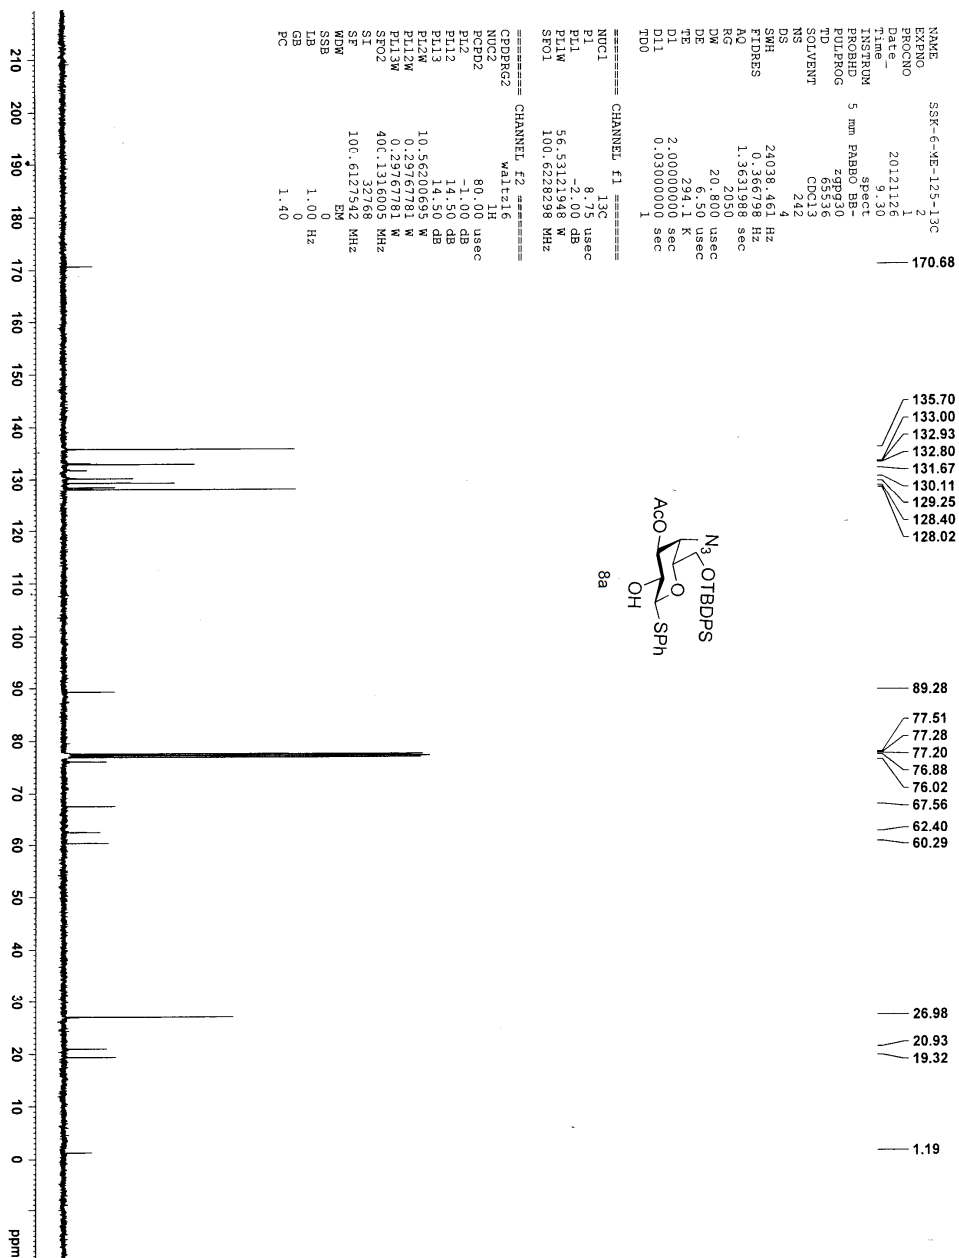

SSK-6-ME-125-COSY

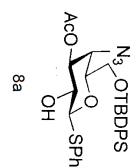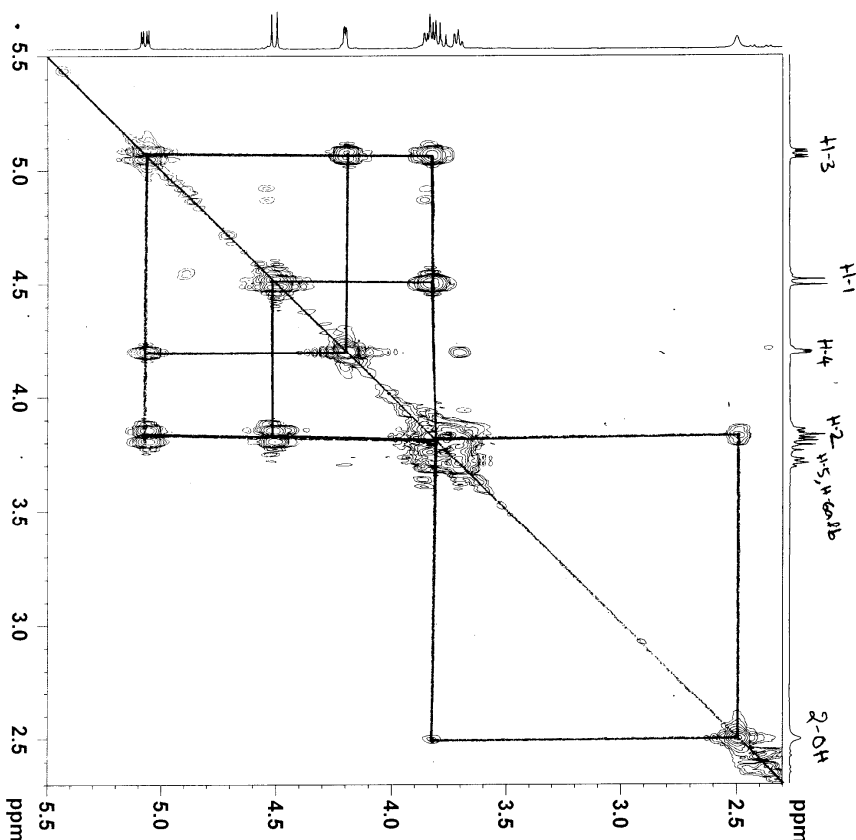

```

NAME          SSK-6-ME-125-COSY
EXPNO         100
PROCNO        1
Date_         20121202
Time          19.12
INSTRUM       5 mm PABBO BB-
PROBHD        cosygpq1
PULPROG       cosygpq1
TD            65536
SOLVENT       CDCl3
NS            32
DS            16
SMH           3259.452 Hz
FIDRES       3.181059 Hz
AQ           0.1571316 sec
RG            181
DM           153.400 usec
DE           6.50 usec
TE           293.8 K
DO           0.0000300 sec
D1           1.0000000 sec
D13          0.0020000 sec
D14          0.0020000 sec
TNO          0.00030680 sec

===== CHANNEL #1 =====
NUC1          1H
P0           13.50 usec
P1           13.50 usec
PL1          -1.00 dB
PL1W         10.56200695 W
SFO1         400.1315923 MHz

===== GRADIENT CHANNEL =====
GPNAM1
GPZ1         10.00 %
P16          1000.00 usec
ND0          1
TD           116
SFO1         400.1316 MHz
FIDRES       28.098896 Hz
SW           8.146 ppm
RNMODE       OF
SI           2048
SF           400.1300095 MHz
RGW          SINE
SFB          SINE
GB           0.00 Hz
PC           1.40
SI           512
MC2          OF
SF           400.1300095 MHz
SFB          SINE
SSB          0
GB           0.00 Hz
    
```



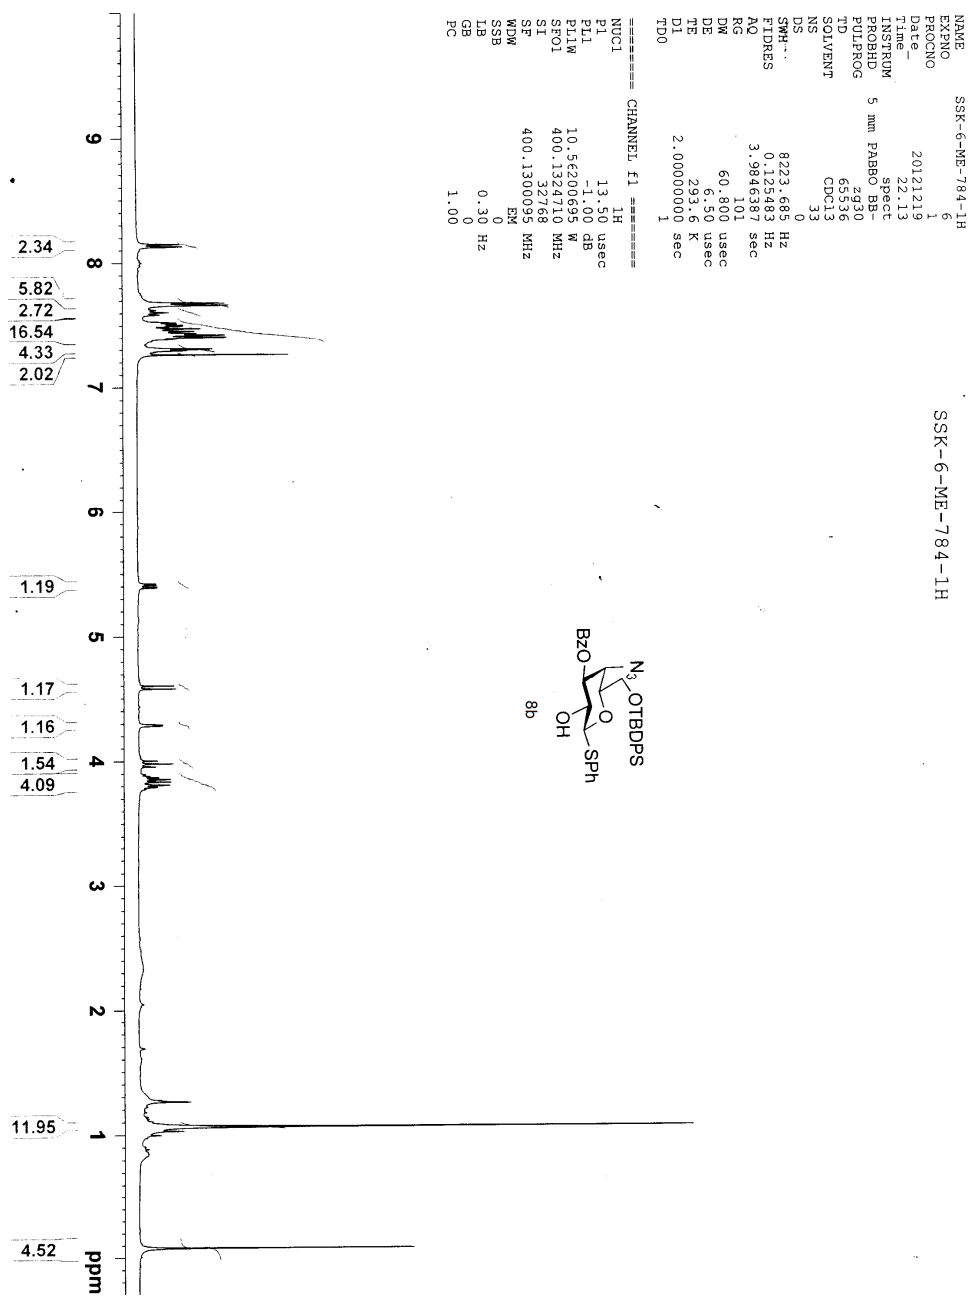

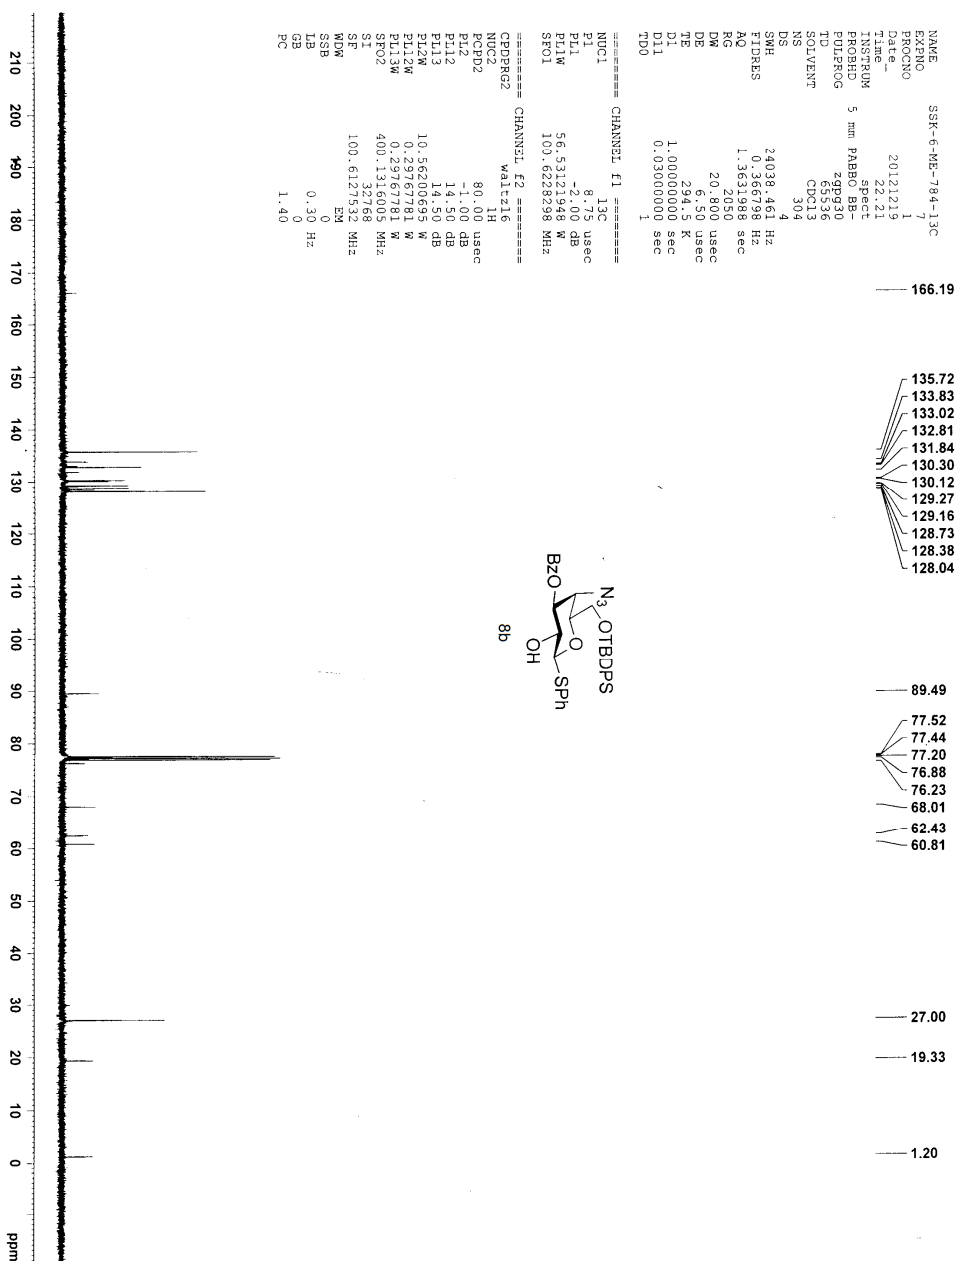

SSK-6-ME-784-COSY

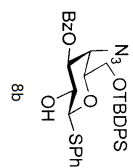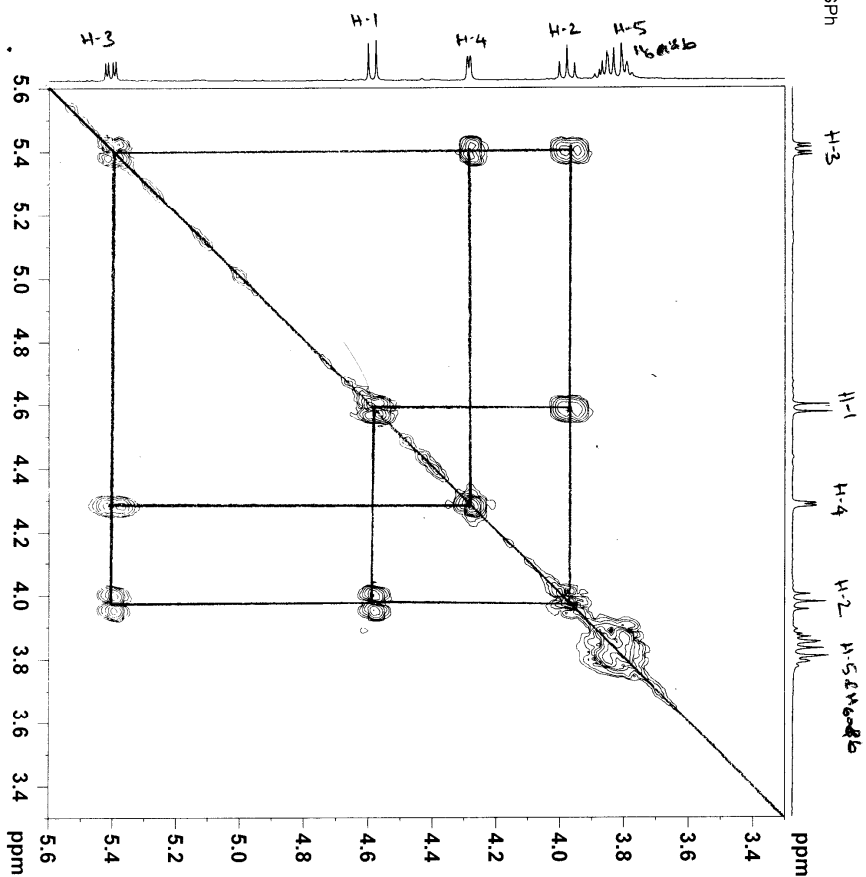

```

NAME          SSK-6-ME-784-COSY
EXPNO         100
PROCNO        1
Date_         20121225
Time          23.18
INSTRUM       5 mm PABBO BB-
PROBHD        spect
PULPROG       cosypprf
TD            1024
SOLVENT       CDCl3
NS            16
DS            16
SWH           3633.724 Hz
FIDRES       0.1489228 Hz
AQ           0.1409228 sec
RG           137.600 usec
DE           6.50 usec
TE           292.6 K
D0           0.00003300 sec
D1           1.00000000 sec
D13          0.00000400 sec
D16          0.00020000 sec
IN0          0.00027520 sec

===== CHANNEL f1 =====
NUC1          1H
P0           13.50 usec
P1           13.50 usec
PL1          -1.00 dB
PL1W         10.56206695 W
SFO1         400.1316265 MHz

===== GRADIENT CHANNEL =====
GPNM1        SINE.100
GP21         10.00 %
P16         1000.00 usec
NDO         251
SI          2048
SF01         400.1316 MHz
FIDRES       14.124201 Hz
SW           9.081 ppm
ENCODE       OF
SI          2048
SF           400.1330095 MHz
WDW          SINE
SSB          0
LB           0.03 Hz
GB           0
  
```

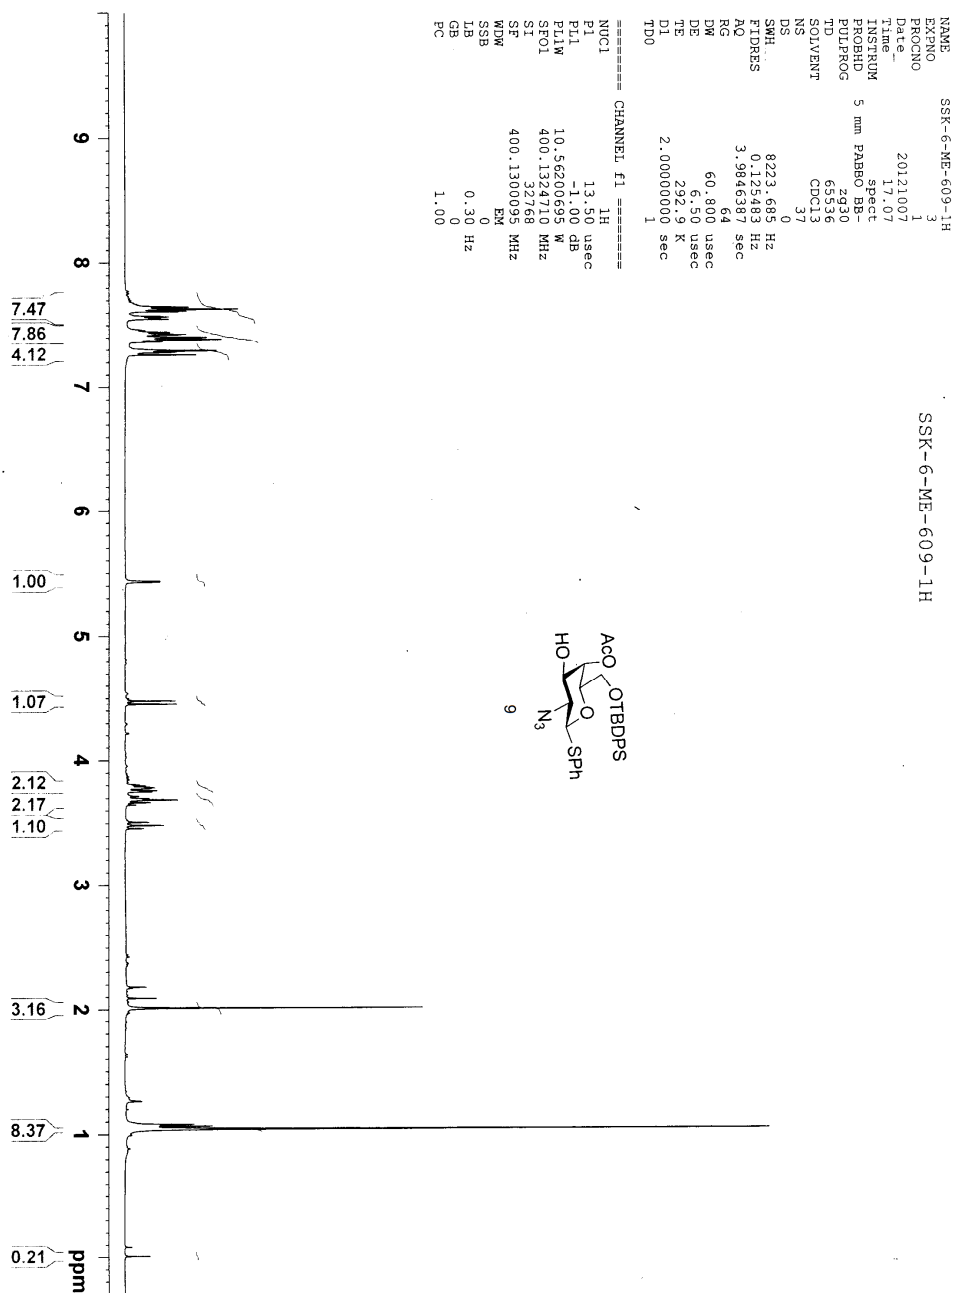

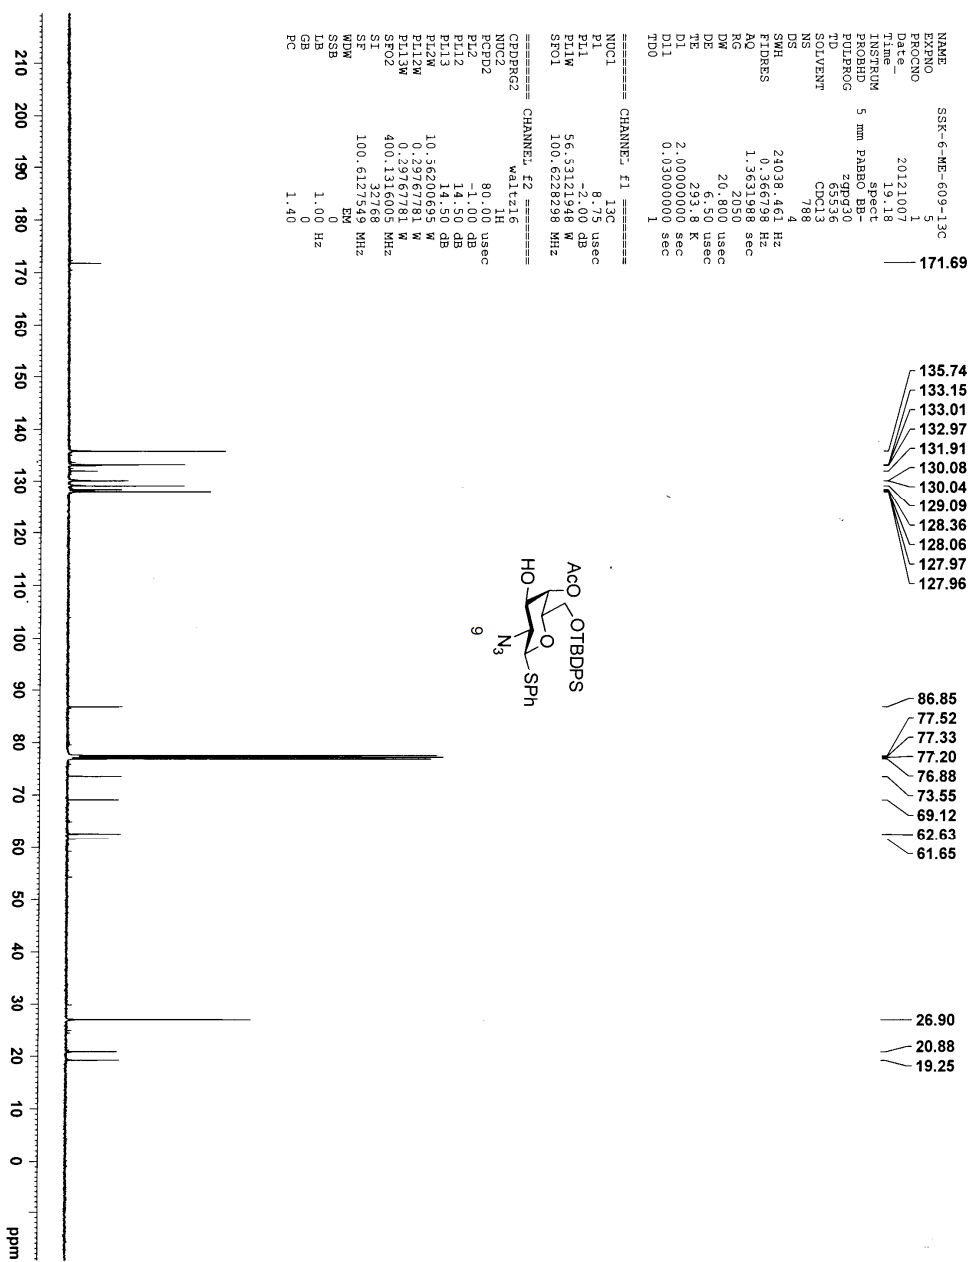

SSK-6-ME-609-COSY

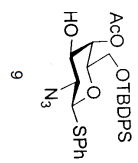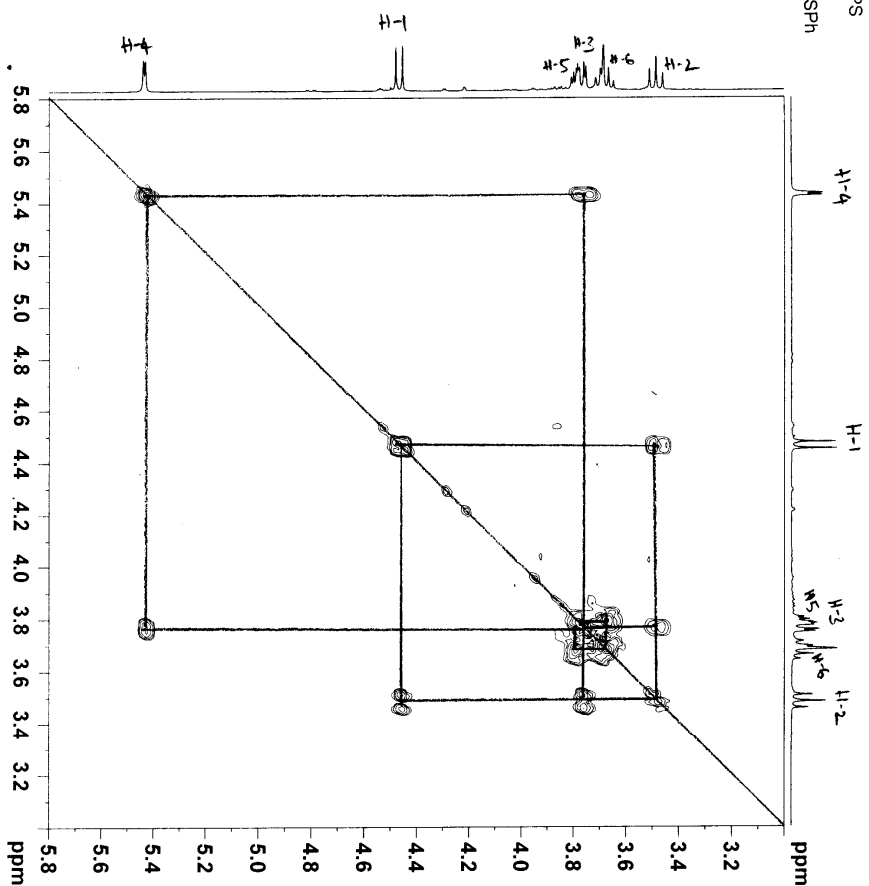

```

NAME          SSK-6-ME-609-COSY
EXPNO         4
PROCNO        1
Date_         2012.007
Time          17.11
INSTRUM       5 mm F400 BBO
PROBHD        spect
PULPROG       cosyppqf
TD            1024
SOLVENT       CDCl3
NS            16
DS            16
SWH           3378.378 Hz
FIDRES        3.429158 Hz
AQ            0.1518140 sec
RG            114
DM            148.000 usec
DE            6.50 usec
TE            292.8 K
DO            0.0000300 sec
D1            1.00000000 sec
D13           0.0000400 sec
D16           0.0002000 sec
IN0           0.00029600 sec

===== CHANNEL f1 =====
NUC1          1H
P1            13.50 usec
PL            13.50 usec
P1L           -1.00 dB
PL1W         10.56203695 W
SFO1         400.1313495 MHz

===== GRADIENT CHANNEL =====
GPNAM1
SINE.100
GPR1         13.00 %
P16          1003.00 usec
NUC2          13C
P17           25.1
SFO2         400.1315 MHz
FIDRES        13.1196838 Hz
SW            8.443 ppm
FMODE         OF
SI            2048
SF            400.1300995 MHz
WDW           SINE
SSB           0
LB            0.00 Hz
GB            0
PC2           1.40
RG2           114
AQ2           0.1518140 sec
SFO3         400.1300995 MHz
WDW           SINE
SSB           0
LB            0.00 Hz
GB            0
    
```

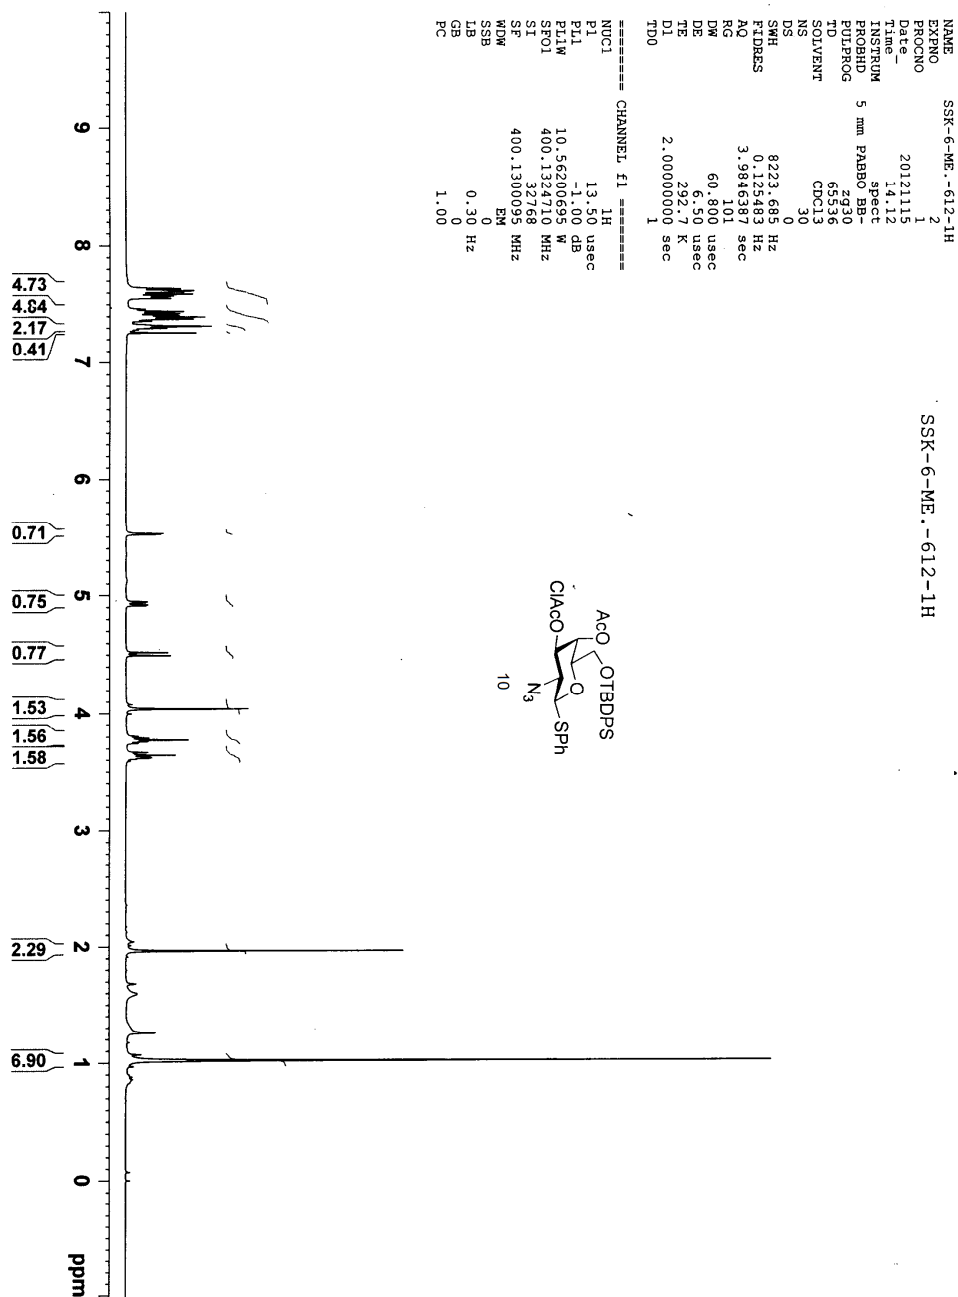

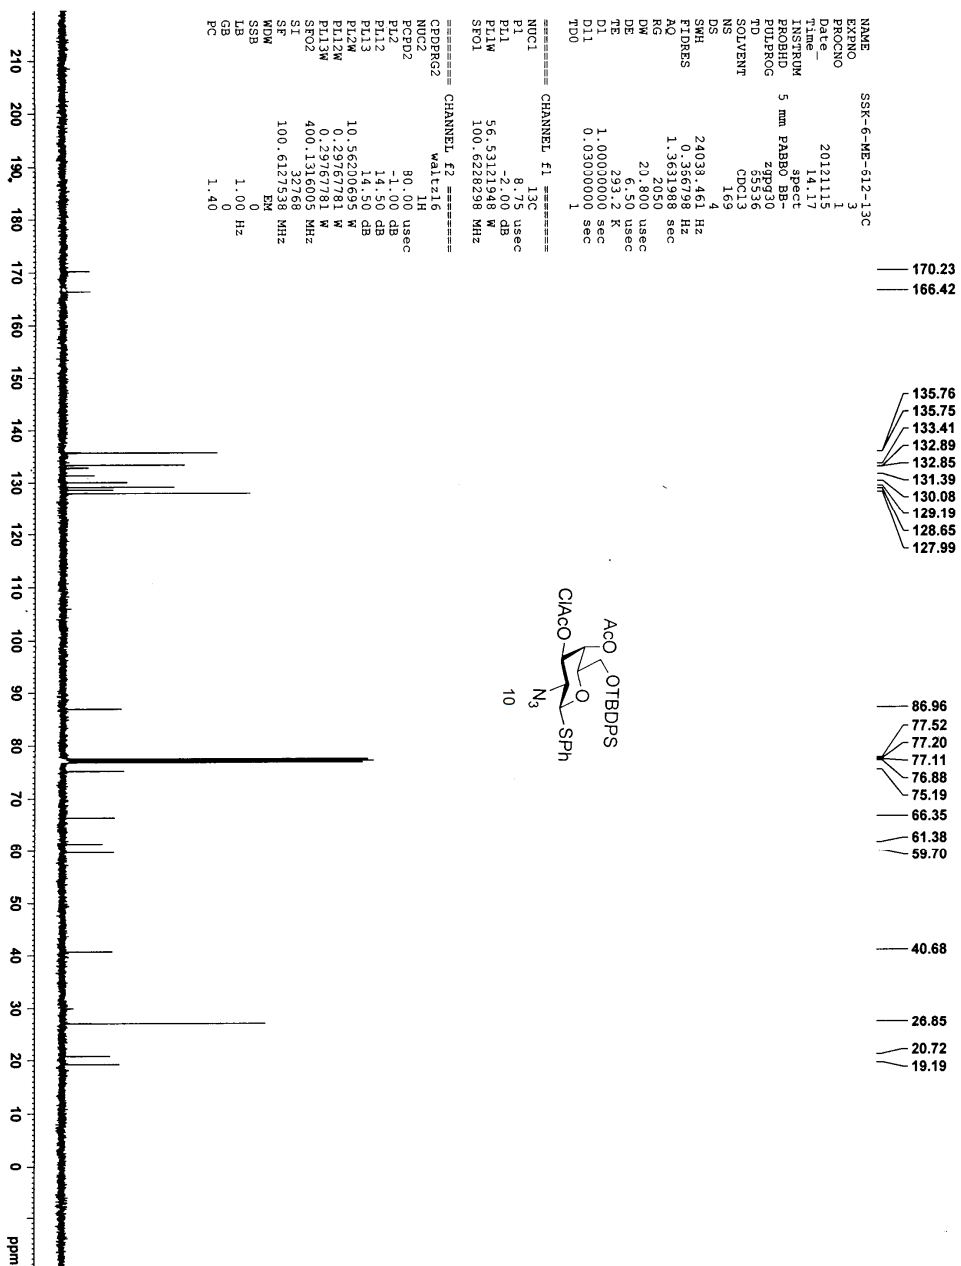



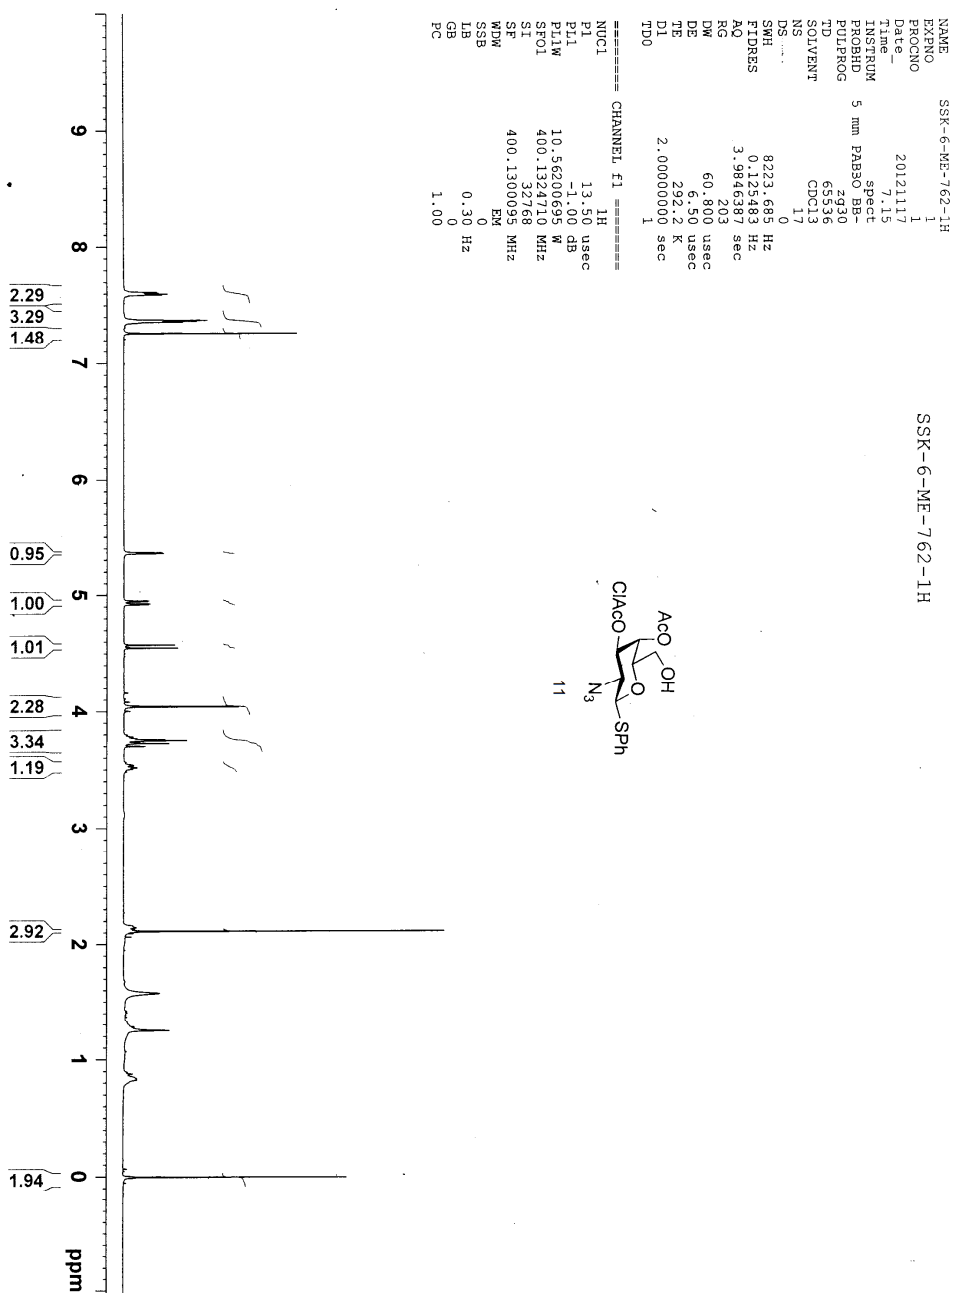

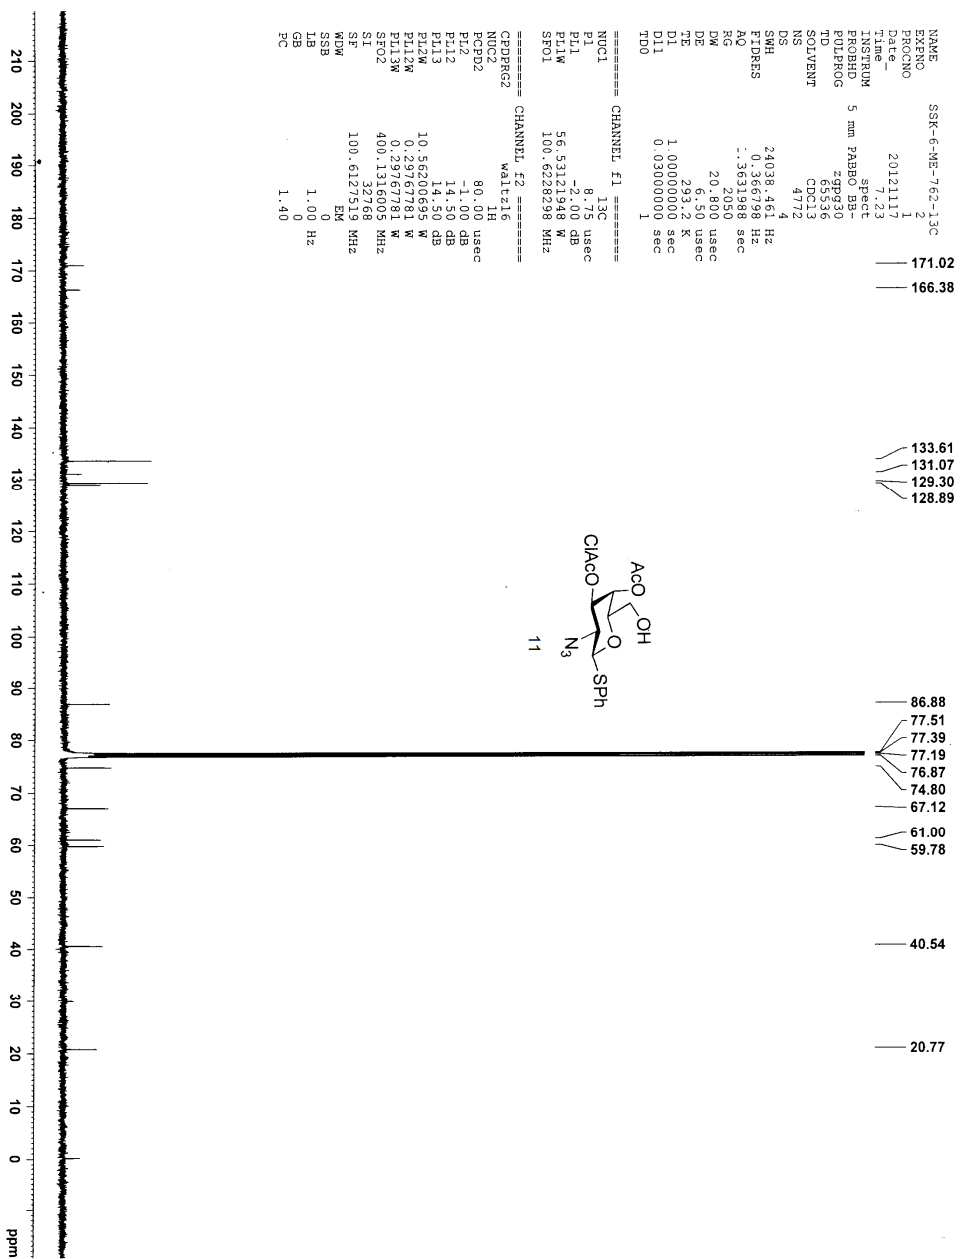

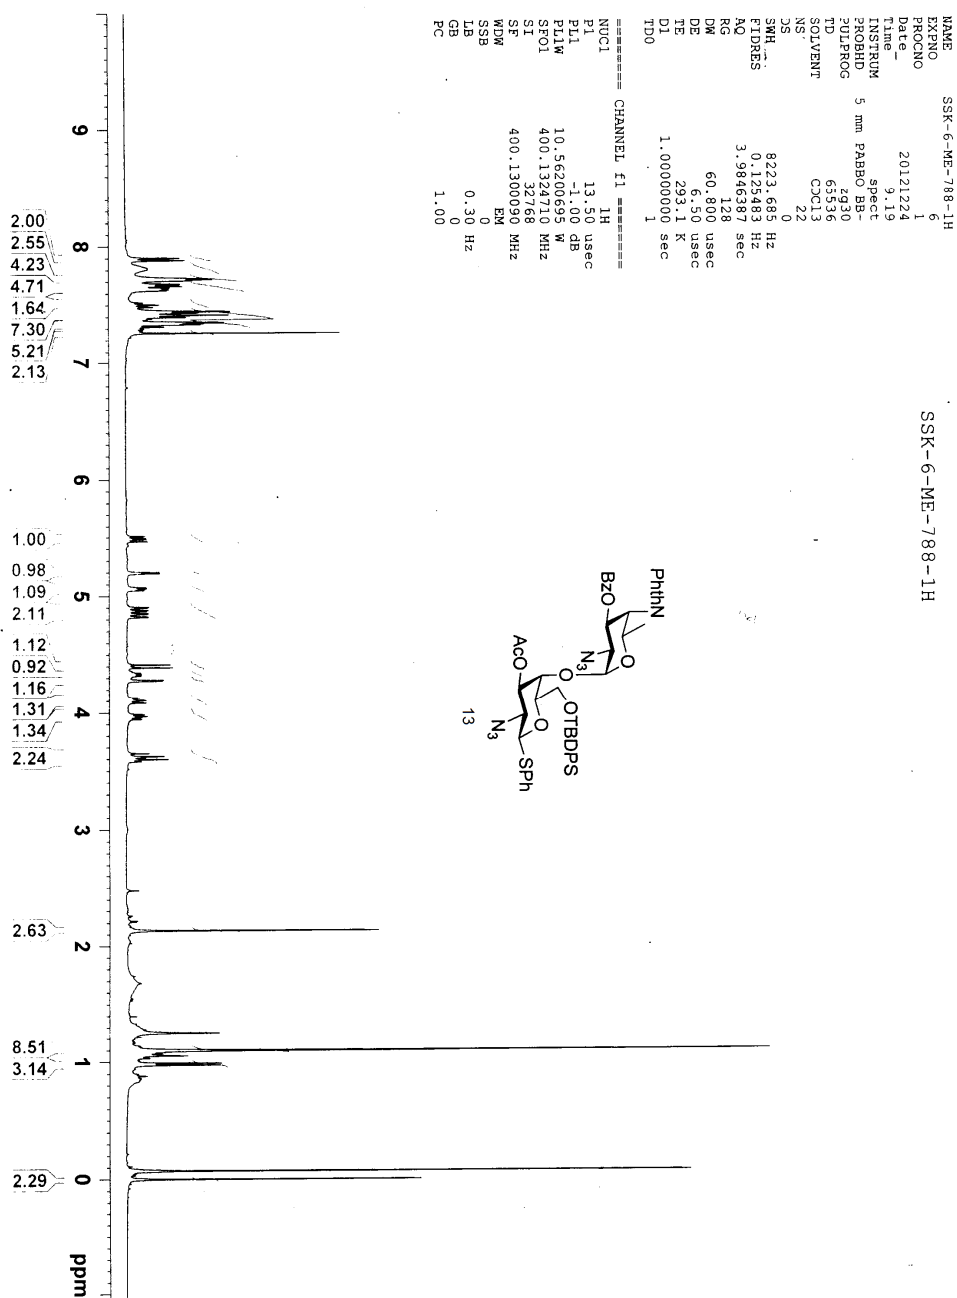

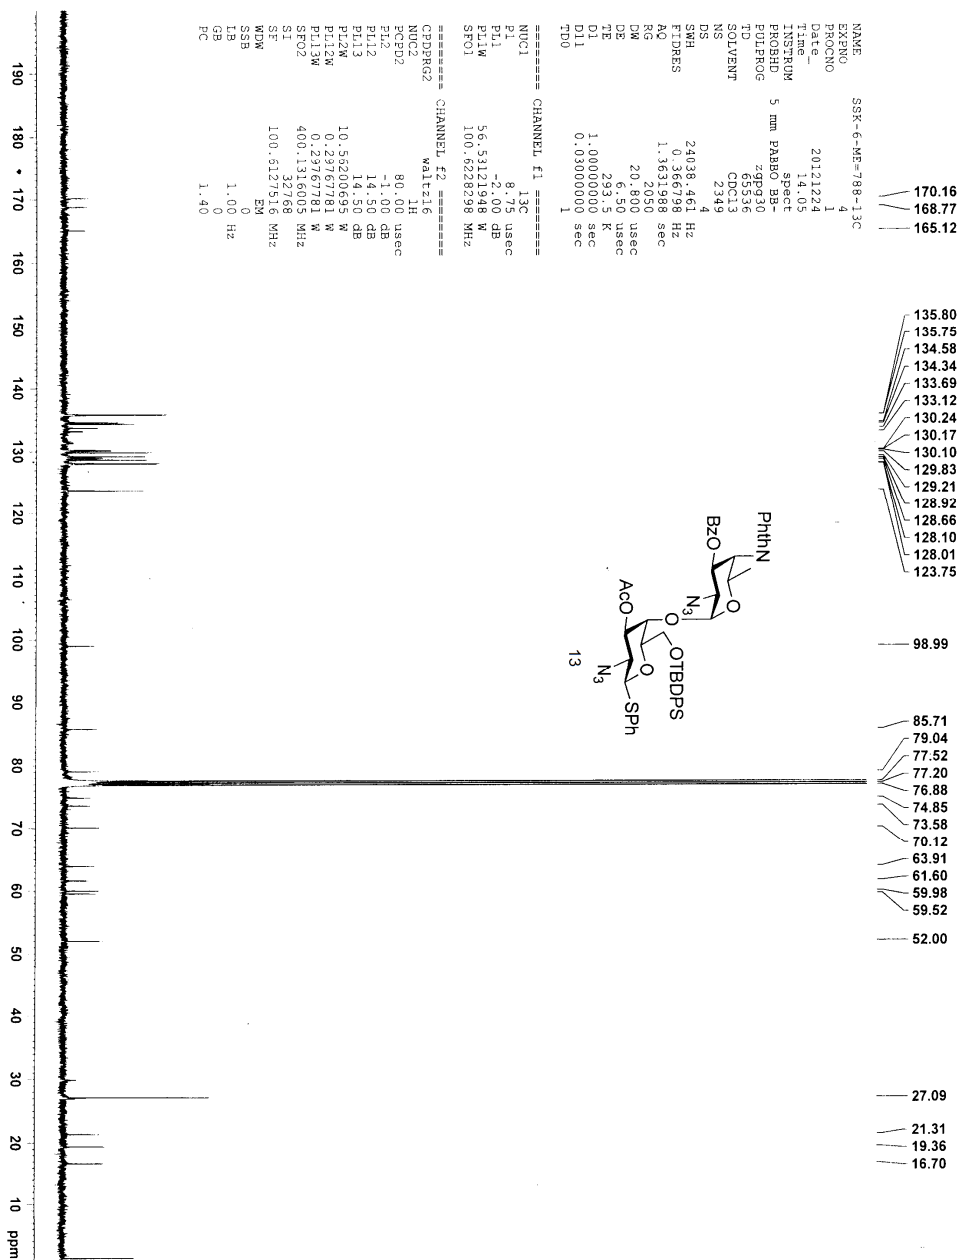

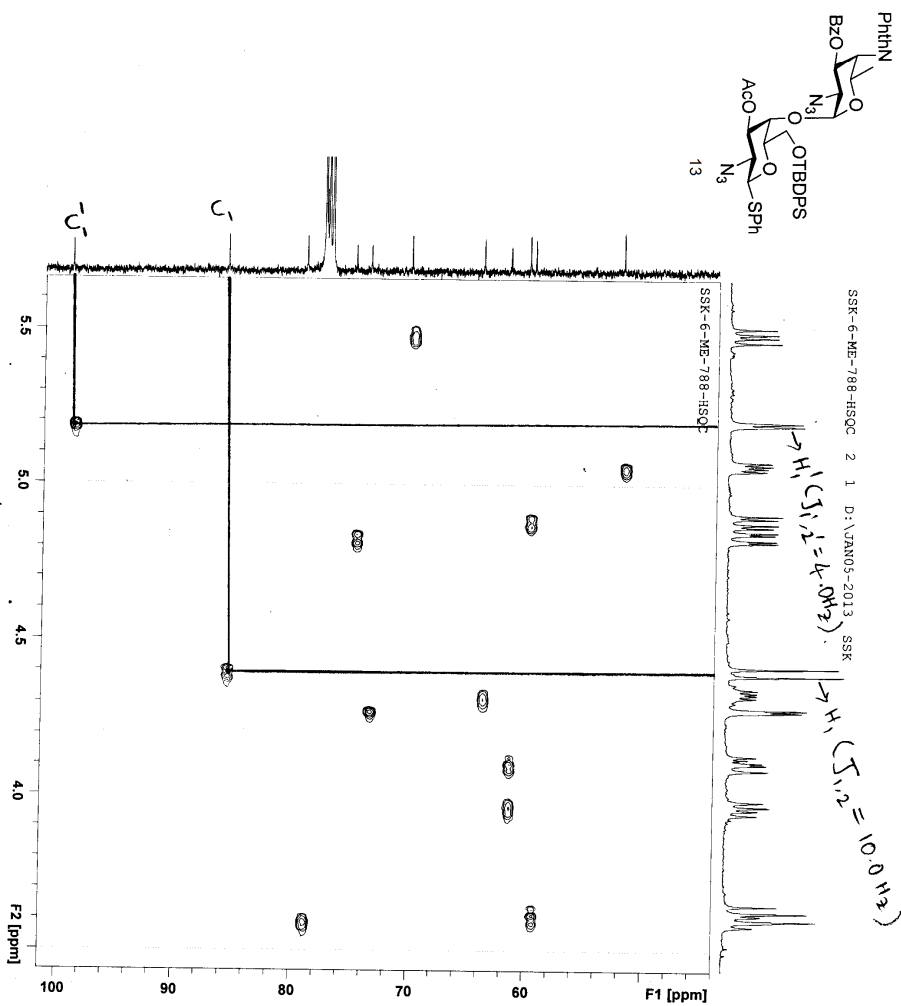

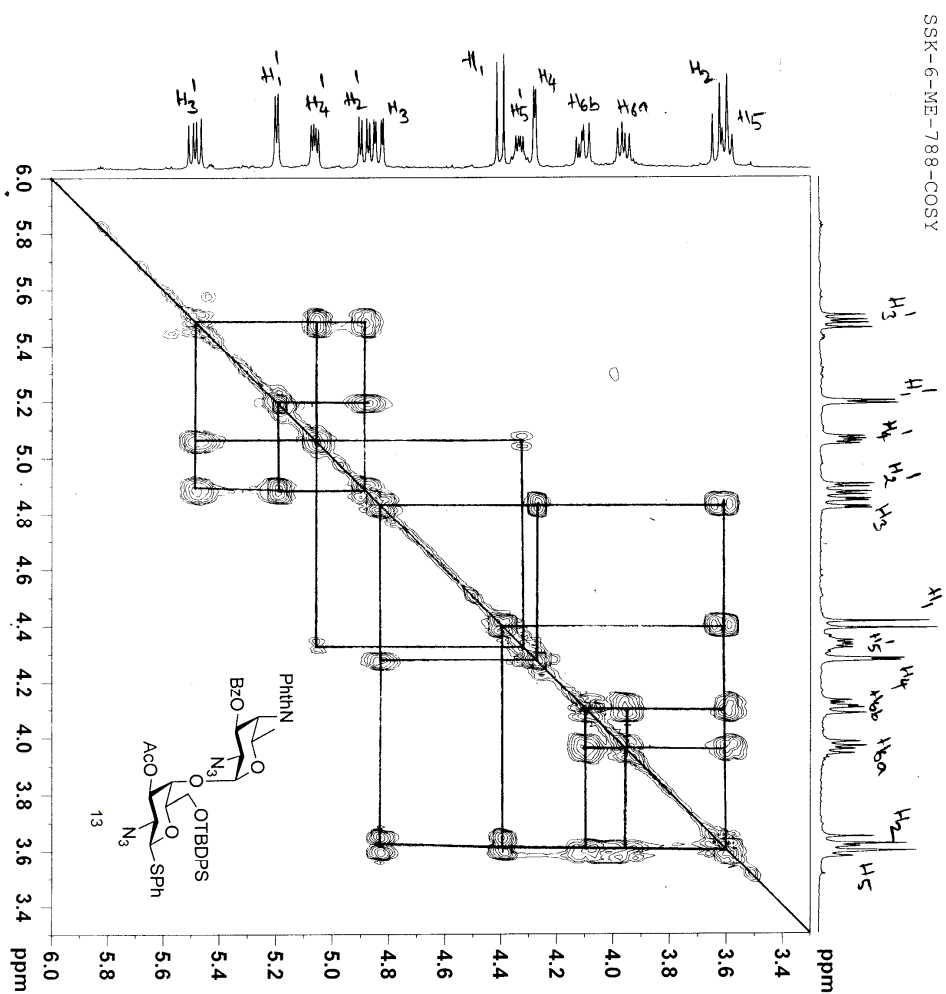

SSK-6-ME-788-COSY

```

NAME SSK-6-ME-788-COSY
EXPNO 2
PROCNO 1
Date_ 20121224
Time 18.04
INSTRUM spect
PROBHD 5 mm PARRO-MS-
PULPROG zgpg30
TD 1024
SOLVENT CDCl3
NS 16
DS 16
SWH 3571.428 Hz
FIDRES 3.487723 Hz
AQ 0.1434100 sec
RG 656
AQ 140.002 usec
DE 6.50 usec
TE 292.7 K
DO 0.00000300 sec
D1 1.00000000 sec
D13 0.00000400 sec
D16 0.00020000 sec
INO 0.00028000 sec

===== CHANNEL f1 =====
NUC1 13
P1 13.20 usec
PL1 -1.00 db
PL12 10.5620695 W
SFO1 400.1316447 MHz

===== GRADIENT CHANNEL =====
GENAMI SINE:100
GP21 10.00 %
P16 1000.00 usec
NUC 1
TD 244
FIDRES 400.1316447 MHz
SFO1 400.1316447 MHz
SM 8.926 ppm
PMDODE OP
SI 2048
SF 400.1300095 MHz
WDW EM
SSB 0
LB 0.00 Hz
PC 1.40
SI 512
RG 656
ACQ 400.1300095 MHz
MVM SINE
SSB 0
LB 0.00 Hz
GB 0
    
```

SSK-6-ME-788-COSY

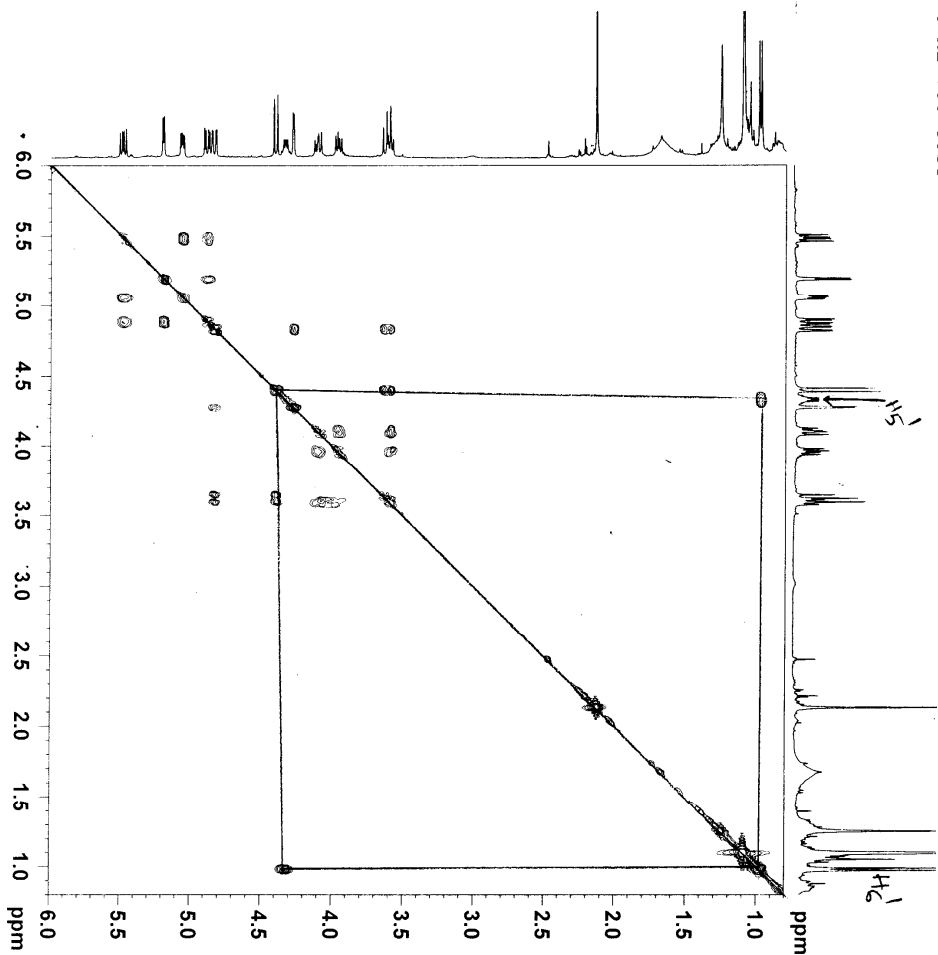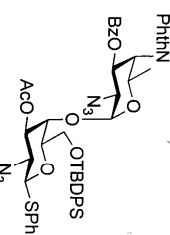

```

===== CHANNEL f1 =====
NUC1          1H
P0            13.50 usec
P1            13.50 usec
PL1          -1.00 dB
PL1W         10.56200695 W
SFO1         400.1315447 MHz

===== GRADIENT CHANNEL =====
GENAM1       SINE:100
GPZ1         10.00 %
F16         1000.00 usec
NFO          1
NPD          1
SFO1         400.1315447 MHz
FTDRES      14.697181 Hz
SW          8.926 ppm
F16MODE     OF
SI          2048
SF          400.1300095 MHz
WDW         SSB
SSB         0
GB          0.00 Hz
MC2         1.40
SI          513
OF          0
SF          400.1300095 MHz
WDW         SSB
SSB         0
GB          0.00 Hz
===== CHANNEL f2 =====
INSTKUM      5 mm PABBO BB-
PROBHD       cosy/90pf
PULPROG      1024
TD           1024
SOLVENT      CDCl3
NS           16
DS           16
SWH          3571.428 Hz
F2DRRES     0.14931320 Hz
AQ          0.14931320
RG          140.000 usec
DMW         5.50 usec
TE          292.7 K
DE          0.00000300 sec
DO          1.00000000 sec
D1          0.00000400 sec
D13         0.00020000 sec
D16         0.00028000 sec
INO          0.00028000 sec
===== CHANNEL f1 =====

```

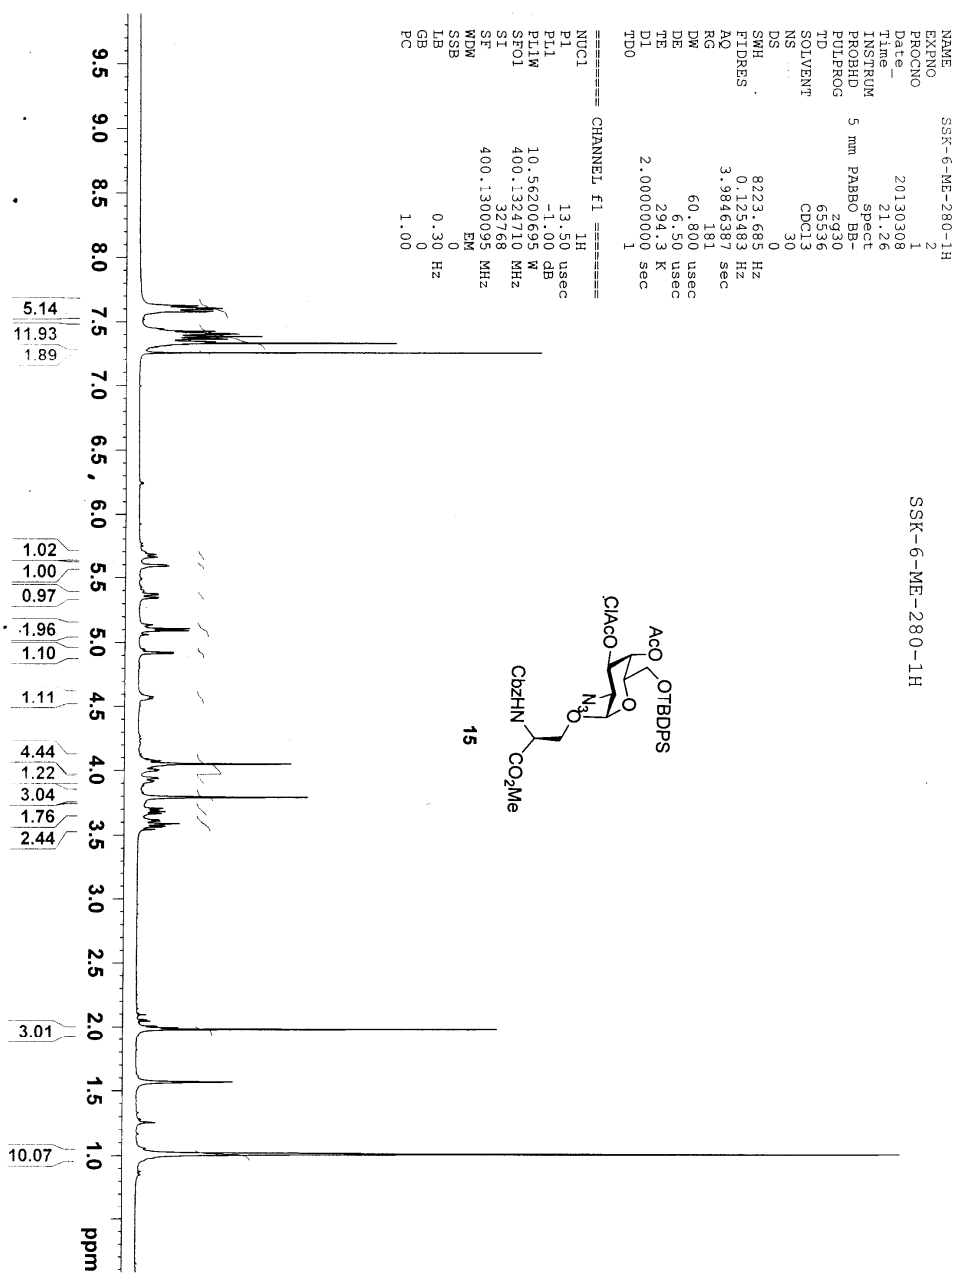



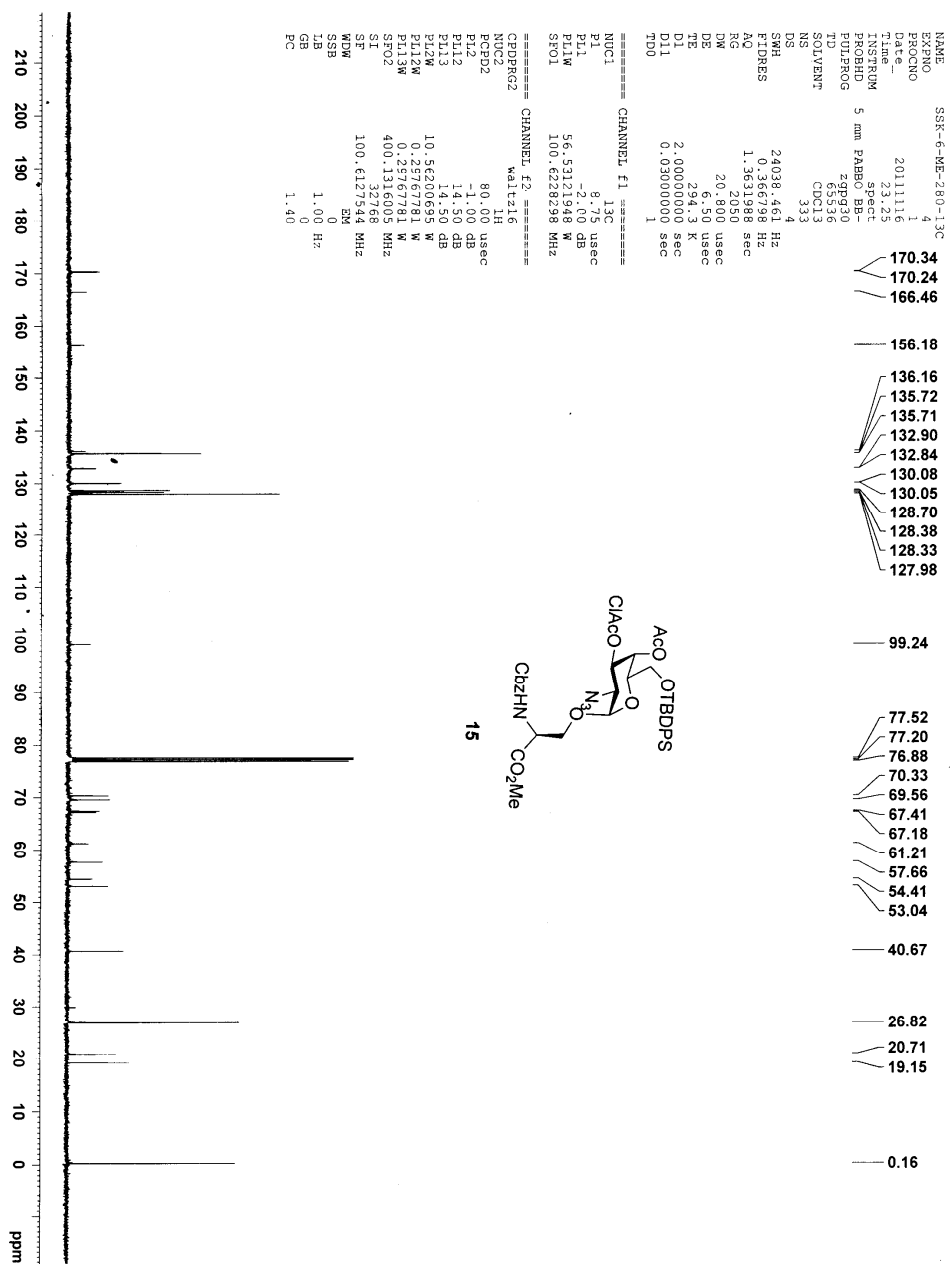

SSK-6-ME-280-1H FOR COSY

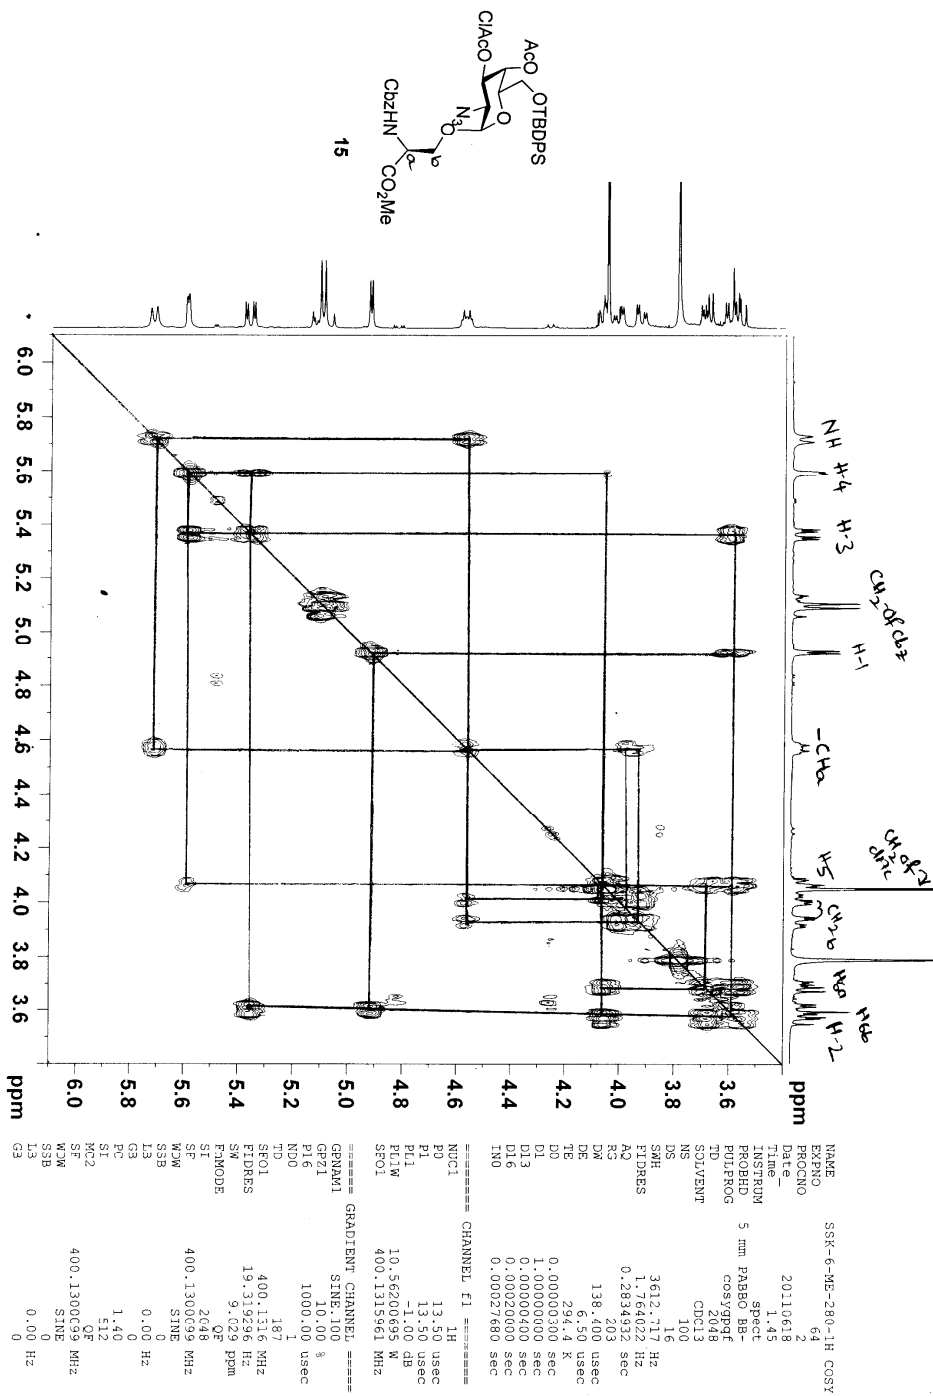

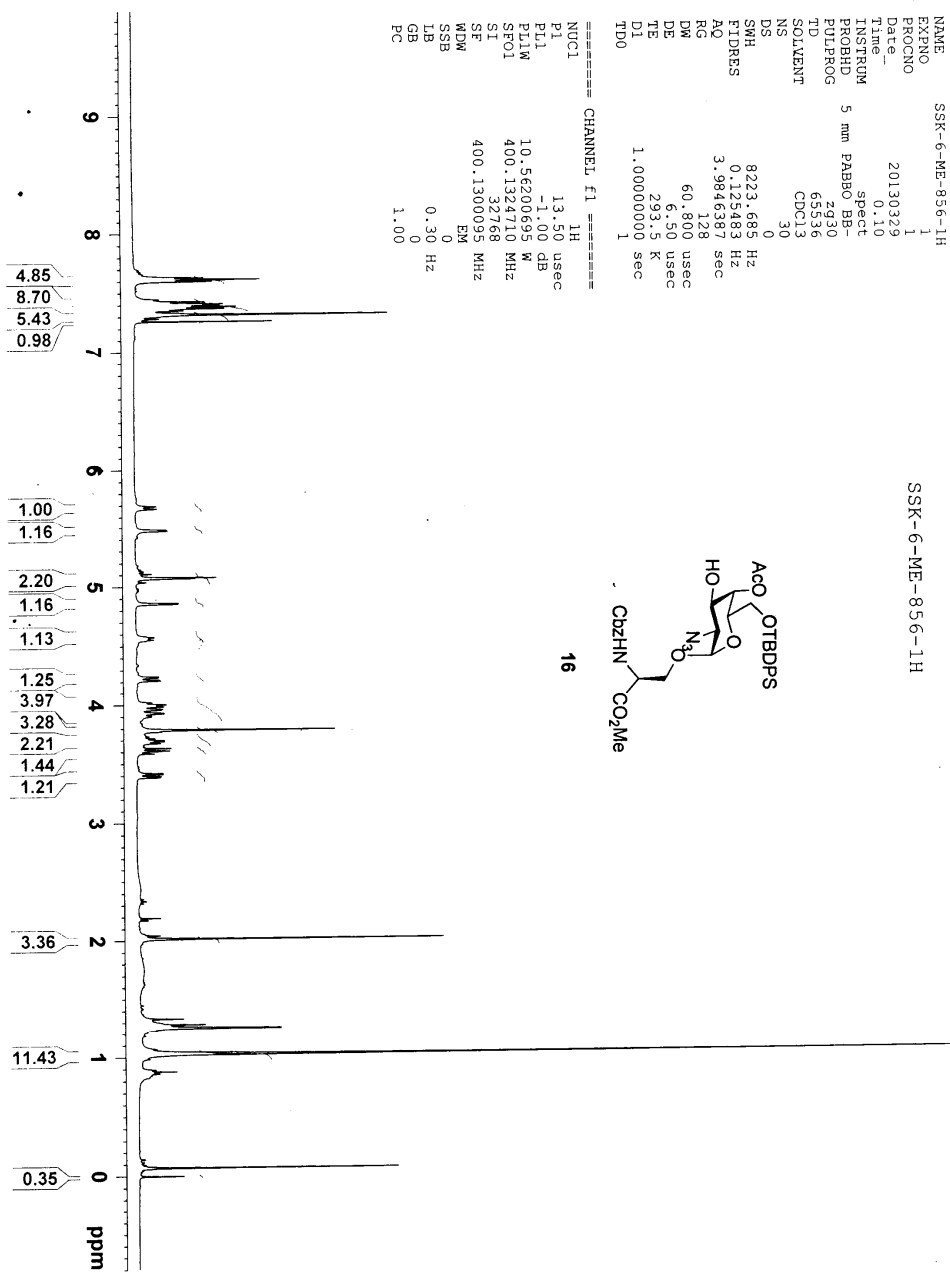

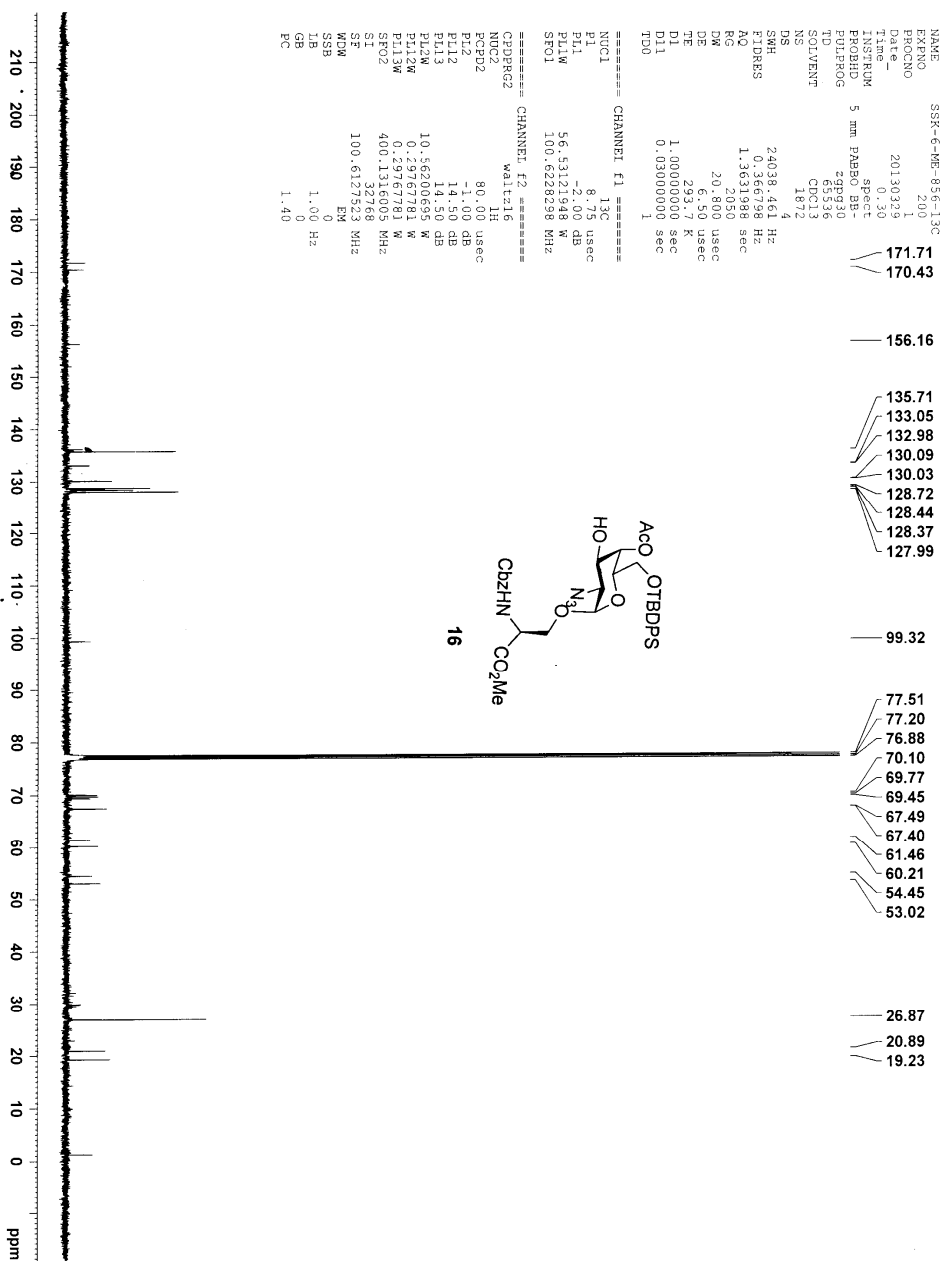

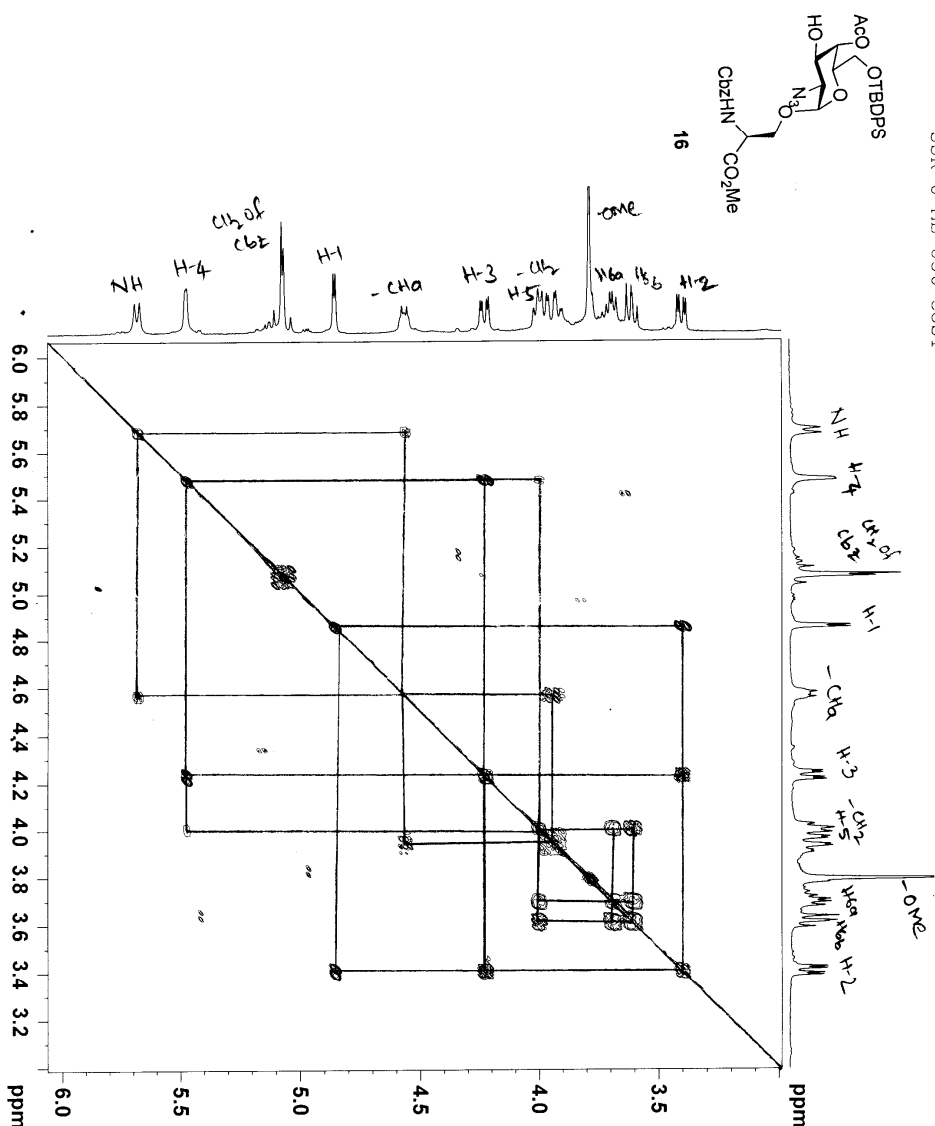

SSK-6-ME-856-COSY

```

NAME          SSK-6-ME-856-COSY
EXPNO         2
PROCNO        1
Date_         20130330
Time          16.16
INSTRUM       spect
PROBHD        5 mm PABBO BB-
PULPROG       cosyppqt
TD            1024
SOLVENT       CDCl3
NS            16
DS            16
SWH           1230.215 Hz
FIDRES        1.204262 Hz
AQ            0.1182922 sec
RG            406.400 usec
DE            6.50 usec
TE            293.3 K
D0            0.00000300 sec
D1            1.00000000 sec
D13           0.00000400 sec
D16           0.00200000 sec
IN0           0.00081280 sec

===== CHANNEL f1 =====
NUC1          1H
P1            13.50 usec
PL1           -1.00 dB
PL1W          10.56200695 W
SFO1          400.1318200 MHz

===== GRADIENT CHANNEL =====
GNAME1        SINE.100
GR21          10.00 %
P16           1000.00 usec
NUC2          1H
SFO2          400.1318 MHz
F1DRES        4.981074 Hz
SW            3.075 ppm
FPMODE        OF
SI            2048
SF            400.1300095 MHz
WDW           SINE
SSB           0
GB            0.00 Hz
LB            1.40
GB            512
MC2           OF
SF            400.1300095 MHz
WDW           SINE
SSB           0
GB            0.00 Hz
    
```

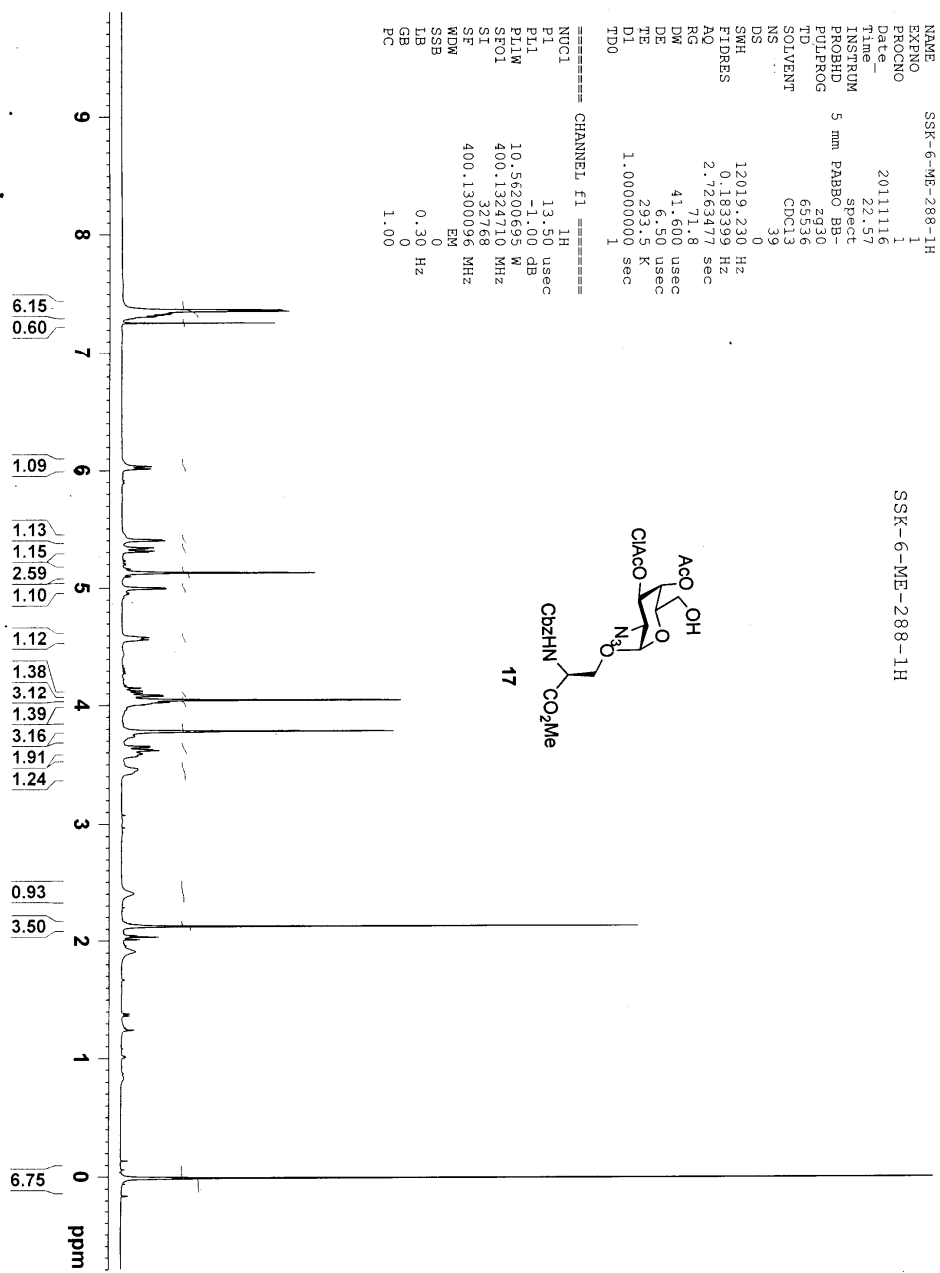

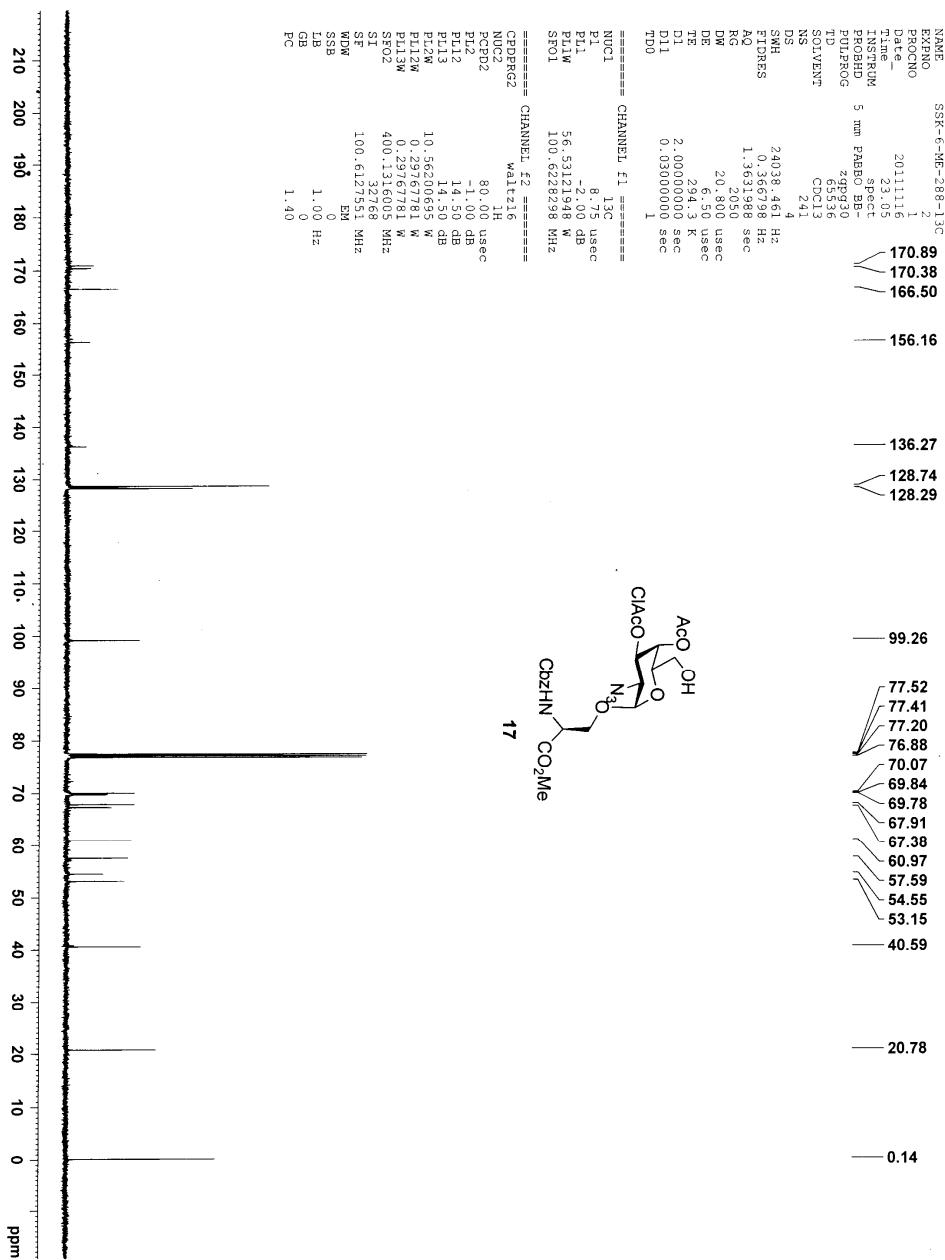

SSK-6-ME-288-COSY

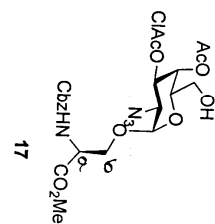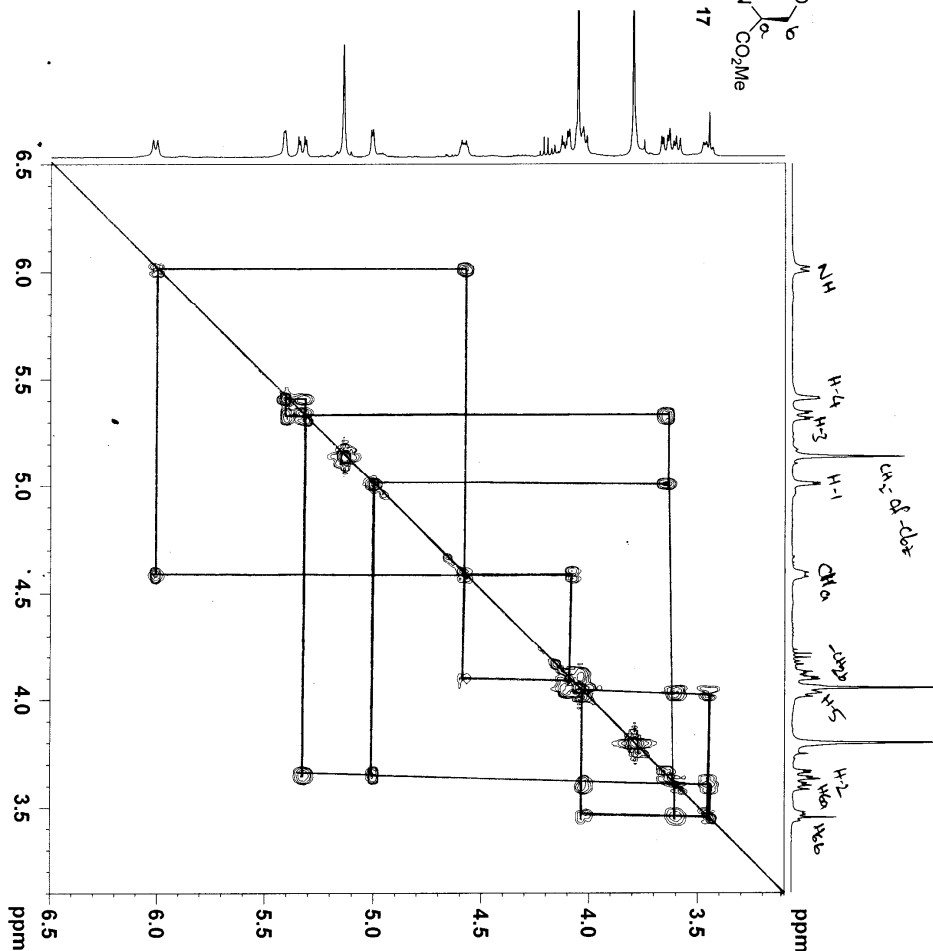

```

NAME          SSK-6-ME-288-COSY
EXPNO        200
PROCNO       1
Date_         20110814
Time         15.53
INSTRUM      spect
PROBHD       5 mm PABBO BB-
PULPROG      cosyppq4f
TD           1024
SOLVENT      CDCl3
NS           16
DS           16
SWH          3333.33 Hz
FIDRES      3.255208 Hz
AQ           0.1536500 sec
RG           0.1536500 sec
DE           150.000 usec
TE           300.0 K
DO           0.00000300 sec
D1           1.00000000 sec
D13          0.00000400 sec
D16          0.00020000 sec
IN0          0.00030000 sec

===== CHANNEL f1 =====
NUC1         1H
P0           13.50 usec
PL1          13.50 usec
PL12         -1.00 dB
PL1W         10.56200695 W
SFO1         400.114398 MHz

===== GRADIENT CHANNEL =====
GR1PMT1     SINE,100 %
SFO2        400.130063 MHz
NUC2         1H
P2           10.00 usec
PL2          1000.00 usec

===== CHANNEL f2 =====
NUC1         1H
P0           13.50 usec
PL1          13.50 usec
PL12         -1.00 dB
PL1W         10.56200695 W
SFO1         400.114398 MHz

===== GRADIENT CHANNEL =====
GR1PMT1     SINE,100 %
SFO2        400.130063 MHz
NUC2         1H
P2           10.00 usec
PL2          1000.00 usec

===== CHANNEL f3 =====
NUC1         1H
P0           13.50 usec
PL1          13.50 usec
PL12         -1.00 dB
PL1W         10.56200695 W
SFO1         400.114398 MHz

===== GRADIENT CHANNEL =====
GR1PMT1     SINE,100 %
SFO2        400.130063 MHz
NUC2         1H
P2           10.00 usec
PL2          1000.00 usec

===== CHANNEL f4 =====
NUC1         1H
P0           13.50 usec
PL1          13.50 usec
PL12         -1.00 dB
PL1W         10.56200695 W
SFO1         400.114398 MHz

===== GRADIENT CHANNEL =====
GR1PMT1     SINE,100 %
SFO2        400.130063 MHz
NUC2         1H
P2           10.00 usec
PL2          1000.00 usec
    
```
